# Supplementary material for: Fusing α and β subunits of the fungal fatty acid synthase leads to improved production of fatty acids
Source: Springer Nature journal article supplement (doi:10.1038/s41598-020-66629-y), 2020-06-17
Supplement: MOESM1 [file 41598_2020_66629_MOESM1_ESM.pdf]

## Supplementary Information

### **Fusing $\alpha$ and $\beta$ subunits of the fungal fatty acid synthase leads to improved production of fatty acids**

Florian Wernig<sup>1</sup>, Sandra Born<sup>1</sup>, Martin Grininger<sup>2</sup>, Eckhard Boles<sup>1</sup> & Mislav Oreb<sup>1\*</sup>

<sup>1</sup>Institute of Molecular Biosciences, Faculty of Biological Sciences, Goethe University Frankfurt, Frankfurt am Main, Germany

<sup>2</sup>Institute of Organic Chemistry and Chemical Biology, Buchmann Institute of Molecular Life Sciences, Goethe University Frankfurt, Frankfurt am Main, Germany

\*corresponding author:

Dr. Mislav Oreb

Institute of Molecular Biosciences

Max-von-Laue Straße 9

60438 Frankfurt

Germany

Telephone +49 (0)69 798 29331

Telefax +49 (0)69 798 29527

E-Mail [m.oreb@bio.uni-frankfurt.de](mailto:m.oreb@bio.uni-frankfurt.de)

**Supplementary Table S1 | Plasmids used in this study.** Under “description” the relevant genetic elements are listed. AmpR, Ampicillin resistance; prefixes “p” and “t” denote promoters and terminators, respectively; MCS, multiple cloning site. Other elements listed follow conventional nomenclature or (for FAS variants) the nomenclature used in the manuscript.

| Laboratory stock code | Plasmid name                                         | Description                                                                                                                   | Used in Figure     | Reference             |
|-----------------------|------------------------------------------------------|-------------------------------------------------------------------------------------------------------------------------------|--------------------|-----------------------|
| ASB22                 | pRS62-H                                              | <i>2μ</i> , AmpR, <i>HphNT1</i> , <i>pHXT7-MCS-tCYC1</i>                                                                      | -                  | Farwick et al., 2014  |
| ASB23                 | pRS62-K                                              | <i>2μ</i> , AmpR, <i>kanMX4</i> , <i>pHXT7-MCS-tCYC1</i>                                                                      | -                  | Farwick et al., 2014  |
| SHV61                 | pRS315-FAS1 <sup>RK</sup> -FAS2                      | <i>CEN6/ARS4</i> , AmpR, <i>LEU2</i> , <i>pFAS1-FAS1<sup>R1834K</sup>-tFAS1</i> , <i>pFAS2-FAS2-tFAS2</i>                     | Fig. 2, S4         | This study            |
| FWV113                | pRS315K-FAS1 <sup>RK</sup> -FAS2                     | <i>CEN6/ARS4</i> , AmpR, <i>kanMX4</i> , <i>pFAS1-FAS1<sup>R1834K</sup>-tFAS1</i> , <i>pFAS2-FAS2-tFAS2</i>                   | Fig. 4a,b; S5      | This study            |
| FWV124                | pRS315K- FAS1 <sup>opt;RK</sup> -FAS2 <sup>opt</sup> | <i>CEN6/ARS4</i> , AmpR, <i>kanMX4</i> , <i>pFAS1-FAS1<sup>opt;R1834K</sup>-tFAS1</i> , <i>pFAS2-FAS2<sup>opt</sup>-tFAS2</i> | S5                 | This study            |
| FWV125                | pRS315K- fusFAS <sup>opt;RK</sup>                    | <i>CEN6/ARS4</i> , AmpR, <i>kanMX4</i> , <i>pFAS1-FAS1<sup>opt;R1834K</sup>-FAS2-tFAS2</i>                                    | S5                 | This study            |
| FWV128                | pRS313K-fusFAS <sup>RK</sup>                         | <i>CEN6/ARS4</i> , AmpR, <i>kanMX4</i> , <i>pFAS1-FAS1<sup>R1834K</sup>-FAS2-tFAS2</i>                                        | Fig. 4a,b; S5      | This study            |
| FWV129                | pRS315K-FAS1-FAS2                                    | <i>CEN6/ARS4</i> , AmpR, <i>kanMX4</i> , <i>pFAS1-FAS1-tFAS1</i> , <i>pFAS2-FAS2-tFAS2</i>                                    | Fig. 4b; S3        | This study            |
| FWV132                | pRS313H-fusFAS                                       | <i>CEN6/ARS4</i> , AmpR, <i>HphNT1</i> , <i>pFAS1-FAS1-FAS2-tFAS2</i>                                                         | Fig. 4b; S3        | This study            |
| FWV133                | pRS313H-fusFAS <sup>RK</sup>                         | <i>CEN6/ARS4</i> , AmpR, <i>HphNT1</i> , <i>pFAS1-FAS1<sup>R1834K</sup>-FAS2-tFAS2</i>                                        | Fig. 4b            | This study            |
| FWV155                | pRS315H-FAS1 <sup>RK</sup> -FAS2                     | <i>CEN6/ARS4</i> , AmpR, <i>hphNT1</i> , <i>pFAS1-FAS1<sup>R1834K</sup>-tFAS1</i> , <i>pFAS2-FAS2-tFAS2</i>                   | Fig. 4b            | This study            |
| SHV29                 | pRCC-N-kanMX4                                        | <i>2μ</i> , AmpR, <i>natNT2</i> , <i>pROX3-opt.CAS9<sup>sp</sup>-tCYC1</i> , <i>pSNR52-gRNA[kanMX4]-tSUB4</i>                 | -                  | This study            |
| SHV42                 | pRCC-N-faa2                                          | <i>2μ</i> , AmpR, <i>natNT2</i> , <i>pROX3-opt.CAS9<sup>sp</sup>-tCYC1</i> , <i>pSNR52-gRNA[faa2]-tSUB4</i>                   | -                  | Henritzi et al., 2018 |
| SHV69                 | pRS313-fusFAS                                        | <i>CEN6/ARS4</i> , AmpR, <i>HIS3</i> , <i>pFAS1-FAS1-FAS2-tFAS2</i>                                                           | Fig. 2             | This study            |
| SHV70                 | pRS313-fusFAS <sup>RK</sup>                          | <i>CEN6/ARS4</i> , AmpR, <i>HIS3</i> , <i>pFAS1-FAS1<sup>R1834K</sup>-FAS2-tFAS2</i>                                          | Fig. 2; Fig. 3; S4 | This study            |
| SHV72                 | pRS313-pHXT7-fusFAS <sup>RK</sup>                    | <i>CEN6/ARS4</i> , AmpR, <i>HIS3</i> , <i>pHXT7<sup>1-392</sup>-FAS1<sup>R1834K</sup>-FAS2-tFAS2</i>                          | Fig. 3             | This study            |
| SHV73                 | pRS313-pTEF1-fusFAS <sup>RK</sup>                    | <i>CEN6/ARS4</i> , AmpR, <i>HIS3</i> , <i>pTEF1-FAS1<sup>R1834K</sup>-FAS2-tFAS2</i>                                          | Fig. 3             | This study            |
| SHV74                 | pRS313-pTDH3-fusFAS <sup>RK</sup>                    | <i>CEN6/ARS4</i> , AmpR, <i>HIS3</i> , <i>pTDH3-FAS1<sup>R1834K</sup>-FAS2-tFAS2</i>                                          | Fig. 3             | This study            |

## Supplementary Table S2 | Oligonucleotides used in this study

| Primer Name | Sequence 5'-3'                                                                                                | Application                                                                                                                     |
|-------------|---------------------------------------------------------------------------------------------------------------|---------------------------------------------------------------------------------------------------------------------------------|
| FWP220      | AGTTTATGTACAAATATCATAAAAAAAGAGAATC<br>TTTCAGCGACATGGAGGCC                                                     | Amplification of <i>kanMX4</i> with overhangs for pRS315 backbone to replace <i>LEU2</i>                                        |
| FWP221      | TTCTCAACAAGTAATTGGTTGTTTGGCCGAGCGG<br>TCTGACACTGGATGGCGGCG                                                    |                                                                                                                                 |
| FWP263      | CGGCATCAGAGCAGATTGTACTGAGAGTGCACCA<br>TCGTCCCAAACCTTCTCAAG                                                    | Amplification of <i>hphNT1</i> with overhangs for pRS313 backbone to replace <i>HIS3</i>                                        |
| FWP264      | GCATCTGTGCGGTATTTACACCGCATATGATCC<br>GCAGCGACATGGAGGC                                                         |                                                                                                                                 |
| FWP275      | GGCATCAGAGCAGATTGTACTGAGAGTGCACCAT<br>AATTCCAGCGACATGGAGGCC                                                   | Amplification of <i>kanMX4</i> with overhangs for pRS313 backbone to replace <i>HIS3</i>                                        |
| FWP276      | TACGCATCTGTGCGGTATTTACACCGCATATGA<br>TCCGTGACACTGGATGGCGGCG                                                   |                                                                                                                                 |
| FWP312      | ATAAAGTTTATGTACAAATATCATAAAAAAAGAG<br>AATCTTTTCGTCCCAAACCTTCTC                                                | Amplification of <i>hphNT1</i> with overhangs for pRS315 backbone to replace <i>LEU2</i>                                        |
| FWP313      | CTCTATTTCTCAACAAGTAATTGGTTGTTTGGCC<br>GAGCGGTCTCAGCGACATGGAGG                                                 |                                                                                                                                 |
| SHP100      | ATGACCTTGATGATTAGCGAAGTAAGTCGACCTA<br>GGTCTATCCGAACCTCCCTTTTTG                                                | Amplification of pFAS2-FAS2-tFAS2 with overlaps to pRS315-FAS1-RK backbone                                                      |
| SHP101      | CCCTCACTAAAGGGAACAAAAGCTGGGTACCGGG<br>CATGCATAGAGCTGCTACGCGGAC                                                |                                                                                                                                 |
| SHP145      | TGAATTGTAATACGACTCACTATAGGGCGAATTG<br>GAGCTCCGCTCGTAGGAACAATTTTCG                                             | Amplification of <i>pHXT7<sup>-1--392</sup></i> with overhangs for pRS313-fusFAS <sup>RK</sup> backbone to replace <i>pFAS1</i> |
| SHP26       | GTGAGATAGGGTTAATGGTCTTGTGGAGTAAGCG<br>TCCATTTTTTGGATTAAAATTAATAAACTTTTTG<br>TTT                               |                                                                                                                                 |
| SHP150      | GAATTGTAATACGACTCACTATAGGGCGAATTGG<br>AGCTCCACAGTTTATTCTGGCATCC                                               | Amplification of <i>pTDH3</i> with overhangs for pRS313-fusFAS <sup>RK</sup> backbone to replace <i>pFAS1</i>                   |
| SHP151      | ATAGGGTTAATGGTCTTGTGGAGTAAGCGTCCAT<br>TTTGTGTTGTTTATGTGTGTTTATTCG                                             |                                                                                                                                 |
| SHP152      | TGAATTGTAATACGACTCACTATAGGGCGAATTG<br>GAGCTCCCTTGCCAACAGGGAGTTC                                               | Amplification of <i>pTEF1</i> with overhangs for pRS313-fusFAS <sup>RK</sup> backbone to replace <i>pFAS1</i>                   |
| SHP153      | GGGTTAATGGTCTTGTGGAGTAAGCGTCCATTTT<br>GTAATTAATAACTTAGATTAGATTGCTATGC                                         |                                                                                                                                 |
| SHP78       | CTCATGACGAGCTCCGTATGCTAAATGAATGTAC<br>TTATGACGATTTGGAACACATTCAAA                                              | Donor-DNA fragment for <i>faa2</i> deletion                                                                                     |
| SHP62       | CCAAGGAAAAATATAAAAAAGTACATTGGGCCT<br>TTTCATGGCGCCGACTGGTTTCTTAAGTGATTA<br>TATAACCGTAAGAAATATTTAACTT           | Donor-DNA fragment for <i>kanMX4</i> cassette deletion in <i>Δfas1</i> locus                                                    |
| SHP63       | TTTTCACATGCTACCTCATTCCGCTCGTAACGTT<br>ACGACCGGGCCCCCTGCGGCTCCGGTAAGAGAGC<br>ACTACGTAGTCCCTCTTTTAATATGTAACGTGT | Donor-DNA fragment for <i>kanMX4</i> cassette deletion in <i>Δfas2</i> locus                                                    |

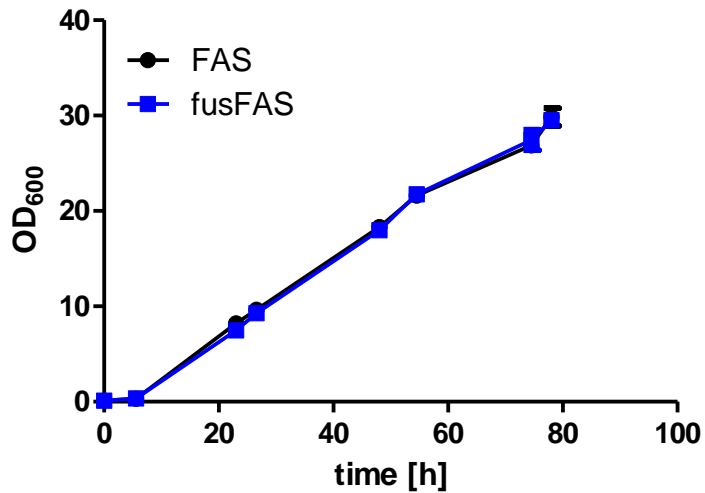

**Supplementary Figure S3 | Complementation of FAS deficiency by FAS constructs.**

The wildtype split FAS (FAS) and fused FAS (fusFAS) were expressed in the strain SHY34 ( $\Delta fas1 \Delta fas2 \Delta faa2$ ) cultivated in buffered YPD medium. The growth was assessed by measuring OD<sub>600</sub> over time. Mean values and standard deviations of biological duplicates are shown. Error bars may be smaller than the symbols.

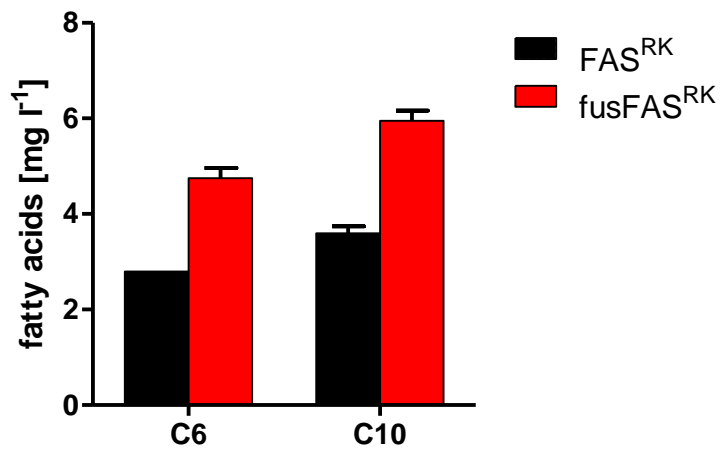

**Supplementary Figure S4 | Production of other SMCFA by FAS constructs.** The production of hexanoic acid (C6) and decanoic acid (C10) by two gene encoded FAS (FAS<sup>RK</sup>) and fused FAS (fusFAS<sup>RK</sup>) was quantified in the same samples (at 48 h) as shown in Fig. 2b in the main manuscript. Mean values and standard deviations of biological duplicates are shown.

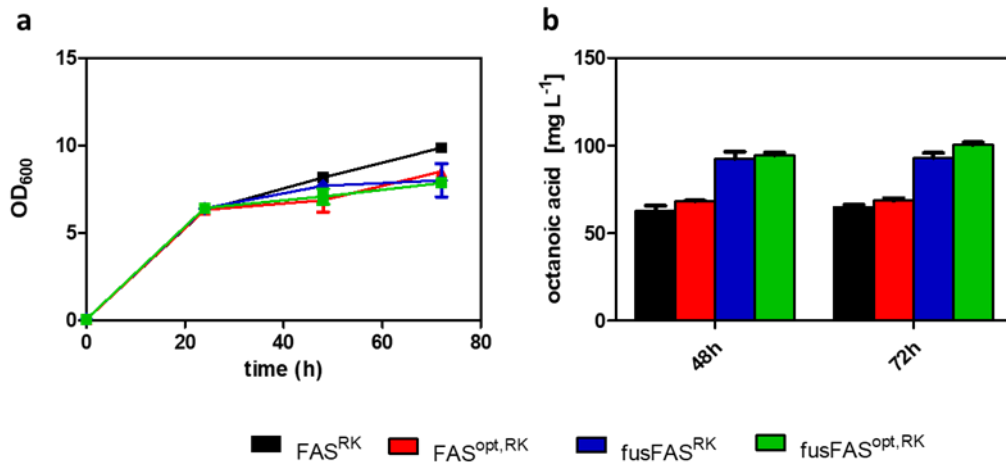

**Supplementary Figure S5 | Codon-optimization of FAS-constructs.** Mutated two gene encoded FAS (FAS<sup>RK</sup>) and fused FAS (fusFAS<sup>RK</sup>) were expressed in strain SHY34 ( $\Delta fas1 \Delta fas2 \Delta faa2$ ) as codon optimized (opt.) or non-optimized variants. Comparison of (a) growth) and octanoic acid production (b) in buffered YPD medium over a time of 72h. For plasmid maintenance hygromycin (100 mg l<sup>-1</sup>) was used. Mean values and standard deviations of biological duplicates are shown.

**Sequences of promoters and FAS constructs.** Sequences of promoters used in Figure 3 are listed. The online tool JCat (<http://www.jcat.de>) was used to codon-optimize the nucleotide sequence and calculate the codon adaptation index (CAI) of FAS ORFs. The change in CAI resulting from optimization is indicated, where appropriate. To introduce the R1834K mutation, the respective native codon “AGA” in *FAS1* was replaced by “AAA”.

>pFAS1

```
TGCGGTCTCGTCCTCTACGAATATGGCTATTTGCCTTCGTATATACCTTTCTATACCAAG
TAATGAATGTCTTGAGGGCCCGTATGGCCGCGCGAAGGCTTAGTTAAGATGTTTCAGCAA
ACGGCAGCATGTGAAAAAACCCGTAGAAAGGTCCGCATCAGCCTTCCATGCCCCGTGCACCC
ACGGCTCCTCGGAGGCCGGGTTATAGCAGCGTCTGCTCCGCATCACGATACACGAGGTGC
AGGCACGGTTCACTACTCCCCTGGCCTCCAACAAACGACGGCCAAAACTTCACATGCCG
CCCAGCCAAGCATAATTACGCAACAGCGATCTTTCCGTCGCACAAGTTAAAAGAAATTGT
TGAAAAATACAAATAATCGCGAACAATACGTTGTTGCTATTTAACGCTTTTGGTCTGACA
GTAAGTGTGCCTTTCCCAATCACCGAAAAGTGTGAACGATTCACTGCGACAATAATCAG
AGATTACAGTCGGCATTGTTGGCATTGTTGGCATACTTTTATCGATTGAACCATCTTCTC
CAAACACTTTTCTTTTCTTTCTATTCTGCAGGACCAACTAAAACCTGGGTATATATATC
ATTATCTATATATATAAACGGCTTTCAACAAAAGTTATAGGGGAAAACTAAAAATATAAGA
AAAAAAAAGGTATTGATTGATAAGGAAAAAGAACCAAGGGAAAAATATAAAAAAGTACAT
TGGGCCTTTTCATACTTGTATCACTTACATTACAAAGAAGAACAACAACCTTTTTTAAA
CGAATTTTCTTTCTTTCTTTTCAATTTATTAATTCTTTTTTTCCATAACAATTCAAGGTC
AAATATATTCTTATATGCTCTTTGAATATTTCTGAAAAATATATAAAGAAAAGAACTAC
AAGAACATCATCCGGAAAATCAGATTATAGACTAGGATTCCGCTCTTTTTTAGTATATTTA
TTCGCCACACCTAACTGCTCTATTATTTCGCTCATT
```

>pFAS2

```
TTCTATCCGAACTCCCCTTTTGTATATCAATATATCTTAATACTTTTCGCCTATTCTTTAC
TATATTTTCTAAATTTTCTCTGGTCTGCAGGCCAAAAACAACAACCTTACTACTGAATCAT
GGACGTGTATTTAGTTTAGCCAAGCAATATTTAAATATCACTCTTCTAAAAATACATTG
GGCATTACCCGCAAACCTAACCCATCGCTTAGCAAAATCCAACCATTTTTTTTTTATCTCC
CGCGTTTTCACATGCTACCTCATTCGCTCGTAACGTTACGACCGAAATCTCACTAAGGC
ACGGTTTTGTTGGGAGTTACAGATGTTGGATAACCAGTTGTTTCTAAACGGTTATGCCT
CATATATAACTTGTAACTGAAGGTTACACAAGACCACATCACCCTGTCGTGCTTTTCT
AATAACCGCTATATTAGACGTTTAAAGGGCTACAGCAACACCAATTGAAATACCATCATT
```

>pTDH3

```
ACAGTTTATTCTCGGCATCCACTAAATATAATGGAGCCCGCTTTTTTAAGCTGGCATCCAG
AAAAAAAAGAATCCCAGCACCAAAATATTGTTTTCTTACCAACCATCAGTTCATAGGT
CCATTCTCTTAGCGCAACTACAGAGAACAGGGGCACAAACAGGCCAAAAACGGGCACAAC
CTCAATGGAGTGATGCAACCTGCCTGGAGTAAATGATGACACAAGGCAATTGACCCACGC
ATGTATCTATCTCATTTTCTTACACCTTCTATTACCTTCTGCTCTCTGATTTGGAAAA
AGCTGAAAAAAAAGGTTGAAACCAGTTCCTGAAATATTCCCTACTTGACTAATAAGT
ATATAAAGACGGTAGGTATTGATTGTAATTCTGTAAATCTATTTCTTAAACTTCTTAAAT
TCTACTTTTATAGTTAGTCTTTTTTTTTTAGTTTTTAAACACCAAGAACTTAGTTTCGAATA
AACACACATAAACAAACAAA
```

>pTEF1

```
CCTTGCCAACAGGGAGTTCTTCAGAGACATGGAGGCTCAAAACGAAATTATTGACAGCCT
AGACATCAATAGTCATACAACAGAAAGCGACCACCAACTTTGGCTGATAATAGCGTATA
AACAATGCATACTTTGTACGTTCAAAATACAATGCAGTAGATATATTTATGCATATTACA
TATAATACATATCACATAGGAAGCAACAGGCGCGTTGGACTTTTAATTTTCGAGGACCGC
GAATCCTTACATCACACCCAATCCCCACAAGTGTATCCCCACACACCATAGCTTCAAAA
TGTTTCTACTCTTTTTTACTCTTCCAGATTTTTCTCGGACTCCGCGCATCGCCGTACCAT
TTCAAAAACCCCAAGCACTACATACTAAATTTCCCTCTTTCTTCTCTAGGGTGTCTGTT
AATTACCCGTAATAAGGTTTGGAAAAGAAAAAGACACCGCCTCGTTTCTTTTTCTTCG
TCGAAAAAGGCAATAAAAATTTTTATCACGTTTCTTTTTCTTGAAAATTTTTTTTTTTGA
TTTTTTTTCTTTTCGATGACCTCCCATTTGATATTTAAGTTAATAAACGGTCATCAATTTT
TCAAGTTTCAGTTTCATTTTTCTTGTCTATTACAACCTTTTTTTACTTCTTGCTCATTAG
AAAGAAAGCATAGCAATCTAATCTAAGTTTTTAATTACAAA
```

>pHXT7<sup>-1-392</sup>

GCTCGTAGGAACAATTTTCGGGCCCCCTGCGTGTTCTTCTGAGGTTTCATCTTTTACATTTGC  
TTCTGCTGGATAATTTTCAGAGGCAACAAGGAAAAATTAGATGGCAAAAAGTCGTCTTTC  
AAGGAAAAATCCCCACCATCTTTTCGAGATCCCCTGTAACCTTATTGGCAACTGAAAGAATG  
AAAAGGAGGAAAAATACAAAATATACTAGAACTGAAAAAAGTATAAATAGAGACGA  
TATATGCCAATACTTCACAATGTTTCGAATCTATTCTTCATTTGCAGCTATTGTAAAATAA  
TAAAACATCAAGAACAACAAGCTCAACTTGTCTTTTCTAAGAACAAGAATAAACACAA  
AAACAAAAAGTTTTTTTAATTTAATCAAAAA

>codon optimized FAS1, CAI change: 0.27 > 0.98

ATGGACGCTTACTCTACTAGACCATTGACTTTTGTCTCACGGTTCTTTGGAACACGTTTTG  
TTGGTTCCAACACTGCTTCTTTCTTCATCGCTTCTCAATTGCAAGAACAATTCAACAAGATC  
TTGCCAGAACCAACTGAAGGTTTCGCTGCTGACGACGAACCAACTACTCCAGCTGAATTG  
GTTGGTAAGTTCTTGGGTTACGTTTCTTCTTTGGTTGAACCATCTAAGGTTGGTCAATTC  
GACCAAGTTTTGAACTTGTGTTGACTGAATTCGAAAACCTGTTACTTGAAGGTAACGAC  
ATCCACGCTTTGGCTGCTAAGTTGTTGCAAGAAAACGACACTACTTTGGTTAAGACTAAG  
GAATTGATCAAGAATACTACTGCTAGAAATCATGGCTAAGAGACCATTGACAAGAAG  
TCTAACTCTGCTTTGTTTCAGAGCTGTTGGTGAAGGTAACGCTCAATTGGTTGCTATCTTC  
GGTGGTCAAGGTAACACTGACGACTACTTTCGAAGAATTGAGAGACTTGTACCAAACCTTAC  
CACGTTTTGGTTGGTGACTTGTATCAAGTTCTCTGCTGAAAACCTTTGTCTGAATTGATCAGA  
ACTACTTTGGACGCTGAAAAGGTTTTCACTCAAGGTTTGAACATCTTGAATGGTTGGAA  
AACCCATCTAACACTCCAGACAAGGACTACTTGTGTCTATCCCAATCTCTTGTCCATTG  
ATCGGTGTTATCCAATTGGCTCACTACGTTGTTACTGCTAAGTTGTTGGGTTTCACTCCA  
GGTGAATTGAGATCTTACTTGAAGGGTGCTACTGGTCACTCTCAAGGTTTGGTTACTGCT  
GTTGCTATCGCTGAAACTGACTCTTGGGAATCTTTCTTCGTTTCTGTTAGAAAGGCTATC  
ACTGTTTTGTTCTTCATCGGTGTTAGATGTTACGAAGCTTACCCAAACACTTCTTTGCCA  
CCATCTATCTTGAAGACTCTTTGGAAAACAACGAAGGTGTTCCATCTCCAATGTTGTCT  
ATCTCTAACTTGACTCAAGAACAAGTTCAAGACTACGTTAACAAGACTAACTCTCACTTG  
CCAGCTGGTAAGCAAGTTGAAATCTCTTTGGTTAACGGTGCTAAGAACCTGGTTGTTTTCT  
GGTCCACCACAATCTTTGTACGGTTTTGAACTTGACTTTGAGAAAAGGCTAAGGCTCCATCT  
GGTTTGGACCAATCTAGAATCCCATTTCTCTGAAAGAAAGTTGAAGTTCTCTAACAGATTC  
TTGCCAGTTGCTTCTCCATTCCACTCTCACTTGTGTTCCAGCTTCTGACTTGATCAAC  
AAGGACTTGGTTAAGAACAACGTTTTCTTTCAACGCTAAGGACATCCAAATCCAGTTTAC  
GACACTTTCGACGGTCTGACTTGAGAGTTTTGTCTGGTCTATCTCTGAAAGAATCGTT  
GACTGTATCATCAGATTGCCAGTTAAGTGGGAAACTACTACTCAATTCAAGGCTACTCAC  
ATCTTGGACTTCCGTTCCAGGTGGTGTCTTGGTTTGGGTGTTTTGACTCACAGAAACAAG  
GACGGTACTGGTGTAGAGTTATCGTTGCTGGTACTTTGGACATCAACCCAGACGACGAC  
TACGGTTTTCAAGCAAGAAATCTTCGACGTTACTTCTAACGGTTTTGAAGAAGAACCCAAAC  
TGTTTGAAGAATACCACCCAAAGTTGATCAAGAACAAGTCTGGTAAGATCTTTCGTTGAA  
ACTAAGTTCTCTAAGTTGATCGGTAGACCACCATTTGTTGGTTCCAGGTATGACTCCATGT  
ACTGTTTCTCCAGACTTTCGTTGCTGCTACTACTAACGCTGGTTACACTATCGAATTGGCT  
GGTGGTGGTTACTTCTCTGCTGCTGGTATGACTGCTGCTATCGACTCTGTTGTTTCTCAA  
ATCGAAAAGGGTTCTACTTTCCGGTATCAACTTGATCTACGTTAACCATTGATGTTGCAA  
TGGGGTATCCCATTTGATCAAGGAATTGAGATCTAAGGTTTACCCAAATCCAATTTCTGACT  
ATCGGTGCTGGTGTCCATCTTTGGAAGTTGCTTCTGAATACATCGAAAACCTTTGGGTTG  
AAGTACTTGGGTTTTGAAGCCAGGTTCTATCGACGCTATCTCTCAAGTTATCAACATCGCT  
AAGGCTCACCCAAACTTCCCAATCGCTTTGCAATGGACTGGTGGTAGAGGTGGTGGTCAC  
CACTCTTTCGAAGACGCTCACACTCCAATGTTGCAAATGACTCTAAGATCAGAAGACAC  
CCAAACATCATGTTGATCTTTCGTTTCTGGTTTTCGTTTCTGCTGACGACACTTACCCATAC  
TTGACTGGTGAATGGTCTACTAAGTTTCGACTACCCACCAATGCCATTGACGCGTTTCTTG  
TTCGTTTCTAGAGTTATGATCGCTAAGGAAGTTAAGACTTCTCCAGACGCTAAGAAGTGT  
ATCGCTGCTTGTACTGGTGTTCAGACGACAAGTGGGAACAACTTACAAGAAGCCAACT  
GGTGGTATCGTTACTGTTAGATCTGAAATGGGTGAACCAATCCACAAGATCGCTACTAGA  
GGTGTATGTTGTGGAAGGAATTCGACGAAACTATCTTCAACTTGCCAAAGAACAAGTTG  
GTTCCAACCTTTGGAAGCTAAGAGAGACTACATCATCTCTAGATTGAACGCTGACTTCCAA  
AAGCCATGGTTTCGCTACTGTTAACGGTCAAGCTAGAGACTTGGCTACTATGACTTACGAA  
GAAGTTGCTAAGAGATTGGTTGAATTGATGTTTCATCAGATCTACTAACTCTTGGTTTCGAC  
GTTACTTGGAGAACTTTCACTGGTGACTTCTTGAAGAAGGTTGAAGAAAGATTTACTAAG  
TCTAAGACTTTGTCTTTGATCCAATCTTACTCTTTGTTGGACAAGCCAGACGAAGCTATC  
GAAAAGGTTTTCAACGCTTACCCAGCTGCTAGAGAACAATTCTTGAACGCTCAAGACATC  
GACCACTTCTTGTCTATGTGTCAAAACCCAATGCAAAAGCCAGTTCCATTTCGTTCCAGTT  
TTGGACAGAAGATTCGAAATCTTCTTCAAGAAGGACTCTTTGTGGCAATCTGAACACTTG



GAAGCTGTTGTTGACCAAGACGTTCAAAGAAGCTTGTATCTTGCACGGTCCAGTTGCTGCT  
CAATTCATAAGGTTATCGACGAACCAATCAAGTCTATCATGGACGGTATCCACGACGGT  
CACATCAAGAAGTTGTTGCACCAATACTACGGTGACGACGAATCTAAGATCCCAGCTGTT  
GAATACTTCGGTGGTGAATCTCCAGTTGACGTTCAATCTCAAGTTGACTCTTCTTCTGTT  
TCTGAAGACTCTGCTGTTTTCAAGGCTACTTCTTCTACTGACGAAGAATCTTGGTTCAAG  
GCTTTGGCTGGTTCTGAAATCAACTGGAGACACGCTTCTTTCTTGTGTTCTTTCATCACT  
CAAGACAAGATGTTTCGTTTCTAACCCAATCAGAAAGGTTTTCAAGCCATCTCAAGGTATG  
GTTGTTGAAATCTCTAACGGTAACACTTCTTCTAAGACTGTTGTTACTTTGTCTGAACCA  
GTTCAAGGTGAATTGAAGCCAAGTGTATCTTGAAGTTGTTGAAGGAAAACATCATCCAA  
ATGGAAATGATCGAAAACAGAACTATGGACGGTAAGCCAGTTTCTTTGCCATTGTTGTAC  
AACTTCAACCCAGACAACGGTTTTCGCTCCAATCTCTGAAGTTATGGAAGACAGAAAACAA  
AGAATCAAGGAAATGTAAGTTGTGGATCGACGAACCATTCAACTTGGACTTCGAC  
CCAAGAGACGTTATCAAGGGTAAGGACTTCGAAATCACTGCTAAGGAAGTTTACGACTTC  
ACTCACGCTGTTGGTAACAAGTGTGAAGACTTCGTTTCTAGACCAGACAGAACTATGTTG  
GCTCCAATGGACTTCGCTATCGTTGTTGGTTGGAGAGCTATCATCAAGGCTATCTTCCA  
AACACTGTTGACGGTGACTTGTGGAAGTTGGTTCACTTGTCTAACGGTTACAAGATGATC  
CCAGGTGCTAAGCCATTGCAAGTTGGTGACGTTGTTTCTACTACTGCTGTTATCGAATCT  
GTTGTTAAACCAACCAACTGGTAAGATCGTTGACGTTGTTGGTACTTTGTCTAGAAAACGGT  
AAGCCAGTTATGGAAGTTACTTCTTCTTCTTCTACAGAGGTAACACTGACTTCGAA  
AACACTTTCCAAAAGACTGTTGAACCAAGTTTACCAAATGCACATCAAGACTTCTAAGGAC  
ATCGCTGTTTTGAGATCTAAGGAATGGTTCCAATTGGACGACGAAGACTTCGACTTGTG  
AACAAGACTTTGACTTTTCGAAACTGAAACTGAAGTTACTTTCAAGAACGCTAACATCTTC  
TCTTCTGTTAAGTGTTCGGTCCAATCAAGGTTGAATTGCCAACTAAGGAAACTGTTGAA  
ATCGGTATCGTTGACTACGAAGCTGGTGCTTCTCACGGTAACCCAGTTGTTGACTTCTTG  
AAGAGAAACGGTCTACTTTGGAACAAAAGGTTAACTTGGAAAACCAATCCAATCGCT  
GTTTTGGACTCTTACACTCCACTACTAACAACCCATACGCTAGAGTTTCTGGTGACTTG  
AACCCAATCCACTTTCTAGACACTTCGCTTCTTACGCTAACTTGGCAGGTACTATCACT  
CACGGTATGTTCTTCTGCTTCTGTTAGAGCTTTGATCGAAAACGGGCTGCTGACTCT  
GTTTTCTTCTAGAGTTAGAGGTTACACTTGTCAATTCGTTGACATGGTTTTTGCAAAACACT  
GCTTTGAAGACTTCTATCCAACACGTTGGTATGATCAACGGTAGAAAAGTTGATCAAGTTC  
GAACTAGAAAACGAAGACGACGTTGTTGTTTTGACTGGTGAAGCTGAAATCGAACAACCA  
GTTACTACTTTTCTGTTTCTACTGGTCAAGGTTCTCAAGAACAAGGATGGGTATGGACTTG  
TACAAGACTTCTAAGGCTGCTCAAGACGTTTGGAACAGAGCTGACAACCCTTCAAGGAC  
ACTTACGGTTTCTCTATCTTGGACATCGTTATCAACAACCCAGTTAACTTACTATCCAC  
TTCGGTGGTAAAAGGGTAAGAGAATCAGAGAAAACACTCTGCTATGATCTTTCGAAACT  
ATCGTTGACGGTAAGTTGAAGACTGAAAAGATCTTCAAGGAAATCAACGAACACTCTACT  
TCTTACTCTTTCAGATCTGAAAAGGGTTTTGTTGCTGCTACTCAATTCACTCAACCAGCT  
TTGACTTTGATGGAAGGCTGCTTTTCGAAGACTTGAAGTCTAAGGGTTTTGATCCCAGCT  
GACGCTACTTTTTCGCTGGTCACTCTTTGGGTGAATACGCTGCTTTGGCTTCTTTGGCTGAC  
GTTATGTCTATCGAATCTTTGGTTGAAGTTGTTTTCTACAGAGGTATGACTATGCAAGTT  
GCTGTTCCAAGAGACGAATTTGGGTAGATCTAACTACGGTATGATCGCTATCAACCAGGT  
AGAGTTGCTGCTTCTTCTCTCAAGAAGCTTTGCAATACGTTGTTGAAAGAGTTGGTAAG  
AGAATGGTTGGTTGGTTGAAATCGTTAACTACAACGTTGAAAACCAACAATACGTTGCA  
GCTGGTACTTGGAGCTTTGGACACTGTTACTAACGTTTTGAACTTTCATCAAGTTGCAA  
AAGATCGACATCATCGAATTGCAAAAGTCTTTGCTTTGGAAGAAGTTGAAGGTCACTTG  
TTCGAAATCATCGACGAAGCTTCTAAGAAGTCTGCTGTTAAGCCAAGACCATTGAAGTTG  
GAAAGAGGTTTTCGCTTGTATCCCATTTGGTTGGTATCTCTGTTCCATTCCACTCTACTTAC  
TTGATGAACGGTGTAAAGCCATTCAAGTCTTTCTTGAAGAAGAACATCATCAAGGAAAAAC  
GTTAAGGTTGCTAGATTGGCTGGTAAGTACATCCAAACTTACTGCTAAGCCATTCCAA  
GTTACTAAGGAATACTTCCAAGACGTTTACGACTTACTGCTTCTGAACCAATCAAGGAA  
ATCATCGACAACCTGGGAAAAGTACGAACAATCTTAA

>codon optimized FAS2, CAI change: 0.32 > 0.98

ATGAAGCCAGAAGTTGAACAAGAATTGGCTCACATCTTGTGACTGAATTGTTGGCTTAC  
CAATTCGCTTCTCCAGTTAGATGGATCGAAACTCAAGACGTTTTCTTGAAGGACTTCAAC  
ACTGAAAGAGTTGTTGAAATCGGTTCCATCTCCAACCTTGGCTGGTATGGCTCAAAGA  
TTGAAGAACAAGTACGAATCTTACGACGCTTGTCTTTGACACAGAGAAATCTTGTGT  
TACTCTAAGGACGCTAAGGAAATCTACTACACTCCAGACCCTGAAATGGCTGCTAAG  
GAAGAACCAGCTAAGGAAGAAGCTCCAGCTCCAACCTCCAGCTGCTTCTGCTCCAGCTCCA  
GCTGCTGCTGCTCCAGCTCCAGTTGCTGCTGCTGCTCCAGCTGCTGCTGCTGCTGAAATC  
GCTGACGAACCAGTTAAGGCTTCTTTGTTGTTGCACGTTTTTGGTTGCTCACAAAGTTGAAG

AAGTCTTTGGACTCTATCCCAATGTCTAAGACTATCAAGGACTTGGTTGGTGGTAAGTCT  
ACTGTTCAAACGAAATCTTGGGTGACTTGGGTAAGGAATTCGGTACTACTCCAGAAAAG  
CCAGAAGAACTCCATTGGAAGAATTGGCTGAAACTTTCCAAGACACTTTCTCTGGTGCT  
TTGGGTAAGCAATCTTCTTTTGGTTGTCTAGATTGATCTCTTCTAAGATGCCAGGTGGT  
TTCACTATCACTGTTGCTAGAAAAGTACTTGCAAAGTACTGATGGGGTTGCCATCTGGTGA  
CAAGACGGTGTGTTTGGTTGGTTGCTTTGTCTAACGAACCAGCTGCTAGATTGGGTCTGAA  
GCTGACGCTAAGGCTTTCTTGGACTCTATGGCTCAAAGTACGCTTCTATCGTTGGTGT  
GACTTGTCTTCTGCTGCTTCTGCTTCTGGTGTCTGCTGGTGTCTGCTGCTGGTGTCT  
GCTATGATCGAACGCTGGTGTCTTTGGAAGAAATCACTAAGGACCACAAGGTTTTGGCTAGA  
CAACAATTGCAAGTTTTGGCTAGATACTTGAAGATGGACTTGGACAACGGTGAAAGAAAG  
TTCTTGAAGGAAAAGGACACTGTTGCTGAATTGCAAGCTCAATTGGACTACTTGAACGCT  
GAATTGGGTGAATTCTTCGTTAACGGTGTGCTACTTCTTTCTCTAGAAAAGGCTAGA  
ACTTTGCACTCTTCTTGGAACTGGGCTAAGCAATCTTTGTTGTCTTTGTAATTCGAAAATC  
ATCCACGGTGTGTTTGAAGAACGTTGACAGAGAAGTTGTTTCTGAAGCTATCAACATCATG  
AACAGATCTAACGACGCTTTGATCAAGTTCATGGAATACCACATCTCTAACACTGACGAA  
ACTAAGGGTGAAAACCTACCAATTGGTTAAGACTTTGGGTGAACAATTGATCGAAAACGT  
AAGCAAGTTTTGGACGTTGACCCAGTTTACAAGGACGTTGCTAAGCCAACCTGGTCCAAAG  
ACTGCTATCGACAAGAACGGTAACATCACTTACTCTGAAGAACCAAGAGAAAAGGTTAGA  
AAGTTGTCTCAATACGTTCAAGAAATGGCTTTGGGTGGTCCAATCACTAAGGAATCTCAA  
CCAATATCGAAGAAGACTTGAAGTGTGACTAGAGTTTACAAGGCTATCTCTGCTCAAGCTGACAAG  
CAAGACATCTCTTCTTCTACTAGAGTTGAATTCGAAAAGTTGTAATTCGACTTGTGATGAAG  
TTCTTGGAACTCTTCTAAGGAAATCGACCCATCTCAAACCTACTCAATTGGCTGGTATGGAC  
GTTGAAGACGCTTTGGACAAGGACTCTACTAAGGAAGTTGCTTCTTTGCCAAAACAAGTCT  
ACTATCTCTAAGACTGTTTCTTCTACTATCCCAAGAGAACTATCCCATCTTGCACCTG  
AGAAAAGAAGACTCCAGCTGGTGTGCTGGAAGTACGACAGACAATTGTCTTCTTTGTTCTTG  
GACGGTTTTGGAAAAGGCTGCTTTCAACGGTGTACTTTCAAGGACAAGTACGTTTTGATC  
ACTGGTGTGGTAAGGGTCTATCGGTGCTGAAGTTTTGCAAGGTTTTGTTGCAAGGTGGT  
GCTAAGGTTGTTGTTACTACTTCTAGATTCTCTAAGCAAGTTACTGACTACTACCAATCT  
ATCTACGCTAAGTACGGTGTGTAAGGGTCTACTTTGATCGTTGTTCCATTCAACCAAGGT  
TCTAAGCAAGACGTTGAAGCTTTGATCGAATTCATCTACGACACTGAAAAGAACGGTGGT  
TTGGGTTGGGACTTGGACGCTATCATCCCATTCGCTGCTATCCAGAACCAAGGTATCGAA  
TTGGAACACATCGACTCTAAGTCTGAATTCGCTCACAGAATCATGTTGACTAACATCTTG  
AGAATGATGGGTTGTGTTAAGAAGCAAAGTCTGCTAGAGGTATCGAAACTAGACCAGCT  
CAAGTTATCTTGCCAATGTCTCCAAACCACGGTACTTTCCGGTGGTGACGGTATGTAATCT  
GAATCTAAGTTGTCTTTGGAACTTTGTTCAACAGATGGCACTCTGAATCTTGGGCTAAC  
CAATTGACTGTTTGTGGTGTCTATCATCGGTTGGACTAGAGGTACTGGTTTTGATGTCTGCT  
AACAACATCATCGCTGAAGGTATCGAAAAGATGGGTGTTAGAATTTCTCTCAAAAAGGAA  
ATGGCTTTCAACTTGTGGGTTTTGTTGACTCCAGAAAGTTGTTGAATTTGTGTCAAAAAGTCT  
CCAGTTATGGCTGACTTGAACGGTGGTTTTGCAATTCGTTCCAGAATTGAAGGAATTCACT  
GCTAAGTTGAGAAAGGAATTGGTTGAAACTTCTGAAGTTAGAAAAGGCTGTTTCTATCGAA  
ACTGCTTTGGAACACAAGGTTGTTAACGGTAACTCTGCTGACGCTGCTTACGCTCAAGTT  
GAAATCCAACCAAGAGCTAACATCCAATTGGACTTCCCAGAATTGAAGCCATACAAGCAA  
GTTAAGCAATCGCTCCAGCTGAATTGGAAGGTTTTGTTGGACTTGGAAAGAGTTATCGTT  
GTTACTGTTTTCTGCTGAAGTTGGTCCATGGGGTCTGCTAGAACTAGATGGGAAATGGAA  
GCTTTCCGGTGAATTTCTTTTGAAGGTTGTGTTGAAATGGCTTGGATCATGGGTTTCATC  
TCTTACCACAACGGTAACTTGAAGGGTAGACCATACTGTTTGGGTTGACTCTAAGACT  
AAGGAACCAGTTGACGACAAGGACGTTAAGGCTAAGTACGAAAATCTATCTTGGAAACAC  
TCTGGTATCAGATTGATCGAACCAGAATTGTTCAACGGTTACAACCCAGAAAAGAAGGAA  
ATGATCCAAGAAGTTATCGTTGAAGAAGACTTGGAAACATTGCAAGCTTCTAAGGAAACT  
GCTGAACAATTCAAGCACCAACACGGTGACAAGGTTGACATCTTCGAAATCCAGAAACT  
GGTGAATACTCTGTTAAGTTGTTGAAGGGTGTACTTTGTACATCCCAAAGGCTTTGAGA  
TTCGACAGATTGGTTGCTGGTCAAATCCCAACTGGTTGGAACGCTAAGACTTACGGTATC  
TCTGACGACATCATCTCTCAAGTTGACCCAATCACTTTGTTTCGTTTTGGTTTTCTGTTGTT  
GAAGCTTTTCATCGCTTCTGGTATCACTGACCATAACGAAATGTACAAGTACGTTACAGTT  
TCTGAAGTTGGTAACTGTTCTGGTTCTGGTATGGGTGGTGTCTTCTGCTTTGAGAGGTATG  
TTCAAGGACAGATTCAAGGACGAACCAGTTCAAACGACATCTTGAAGAATCTTTTCATC  
AACACTATGTCTGCTTGGGTTAACATGTTGTTGATCTCTTCTTCTGGTCCAATCAAGACT  
CCAGTTGGTGTCTGTGCTACTTCTGTTGAATCTGTTGACATCGGTGTTGAAACTATCTTG  
TCTGGTAAGGCTAGAATCTGTATCGTTGGTGGTTACGACGACTTCCAAGAAGAAGGTTCT  
TTCGAATTCGGTAACATGAAGGCTACTTCTAACACTTTGGAAGAATTGCAACACGGTAGA  
ACTCCAGCTGAAATGTCTAGACCAGCTACTACTACTAGAAACGGTTTTCATGGAAGCTCAA  
GGTGTGGTATCCAAATCATCATGCAAGCTGACTTGGCTTTGAAGATGGGTGTTCCAATC

TACGGTATCGTTGCTATGGCTGCTACTGCTACTGACAAGATCGGTAGATCTGTTCCAGCT  
CCAGGTAAGGGTATCTTGACTACTGCTAGAGAACACCCTCTTCTGTTAAGTACGCTTCT  
CCAACTTGAACATGAAGTACAGAAAGAGACAATTGGTTACTAGAGAAGCTCAAATCAAG  
GACTGGGTTGAAAACGAATTGGAAGCTTTGAAGTTGGAAGCTGAAGAAAATCCCATCTGAA  
GACCAAAACGAATTCTTGTGGAAAGAAGCTAGAGAAAATCCACAACGAAGCTGAATCTCAA  
TTGAGAGCTGCTCAACAACAATGGGGTAACGACTTCTACAAGAGAGACCCAAGAATCGCT  
CCATTGAGAGGTGCTTTGGCTACTTACGGTTTACTATCGACGACTTGGGTGTTGCTTCT  
TTCCACGGTACTTCTACTAAGGCTAACGACAAGAACGAATCTGCTACTATCAACGAAATG  
ATGAAGCACTTGGGTAGATCTGAAGGTAACCCAGTTATCGGTGTTTTCCAAAAGTCTTG  
ACTGGTCACCCAAAGGGTGTCTGGTGGTGGATGATGAACGGTGTCTTGCAAATCTTG  
AACTCTGGTATCATCCAGGTAACAGAAACGCTGACAACGTTGACAAGATCTTGGAACAA  
TTCGAATACGTTTTGTACCCATCTAAGACTTTGAAGACTGACGGTGTAGAGCTGTTTTCT  
ATCACTTCTTTTCGGTTTTTCGGTCAAAAGGGTGGTCAAGCTATCGTTGTTCAACCAGACTAC  
TTGTACGGTGTCTACTGAAGACAGATAACAACGAATACGTTGCTAAGGTTTTCTGCTAGA  
GAAAAGTCTGCTTACAAGTTCTTCCACAACGGTATGATCTACAACAAGTTGTTGTTTTCT  
AAGGAACACGCTCCATACACTGACGAATTGGAAGAAGACGTTTACTTGGACCCATTGGCT  
AGAGTTTCTAAGGACAAGAAGTCTGGTTCTTTGACTTTCAACTCTAAGAACATCCAATCT  
AAGGACTCTTACATCAACGCTAACACTATCGAAACTGCTAAGATGATCGAAAACATGACT  
AAGGAAAAGGTTTTCTAACGGTGGTGTGGTGTGACGTTGAATTGATCACTTCTATCAAC  
GTTGAAAACGACACTTTCATCGAAAGAACTTCACTCCACAAGAAAATCGAATACTGTTCT  
GCTCAACCATCTGTTCAATCTTCTTTTCGCTGGTACTTGGTCTGCTAAGGAAGCTGTTTTT  
AAGTCTTTGGGTGTTAAGTCTTTGGGTGGTGGTGTGCTTTGAAGGACATCGAAATCGTT  
AGAGTTAACAAGAACGCTCCAGCTGTTGAATTGCACGGTAACGCTAAGAAGGCTGCTGAA  
GAAGCTGGTGTACTGACGTTAAGGTTTTCTATCTCTCACGACGACTTGCAAGCTGTTGCT  
GTTGCTGTTTTCTACTAAGAAGTAA

>fusFAS based on native FAS1 and FAS2 ORFs

ATGGACGCTTACTCCACAAGACCATTAACCCTATCTCACGGTTCTTTAGAGCACGTGCTT  
CTGGTACCAACCGCTTCATTTTTTCATTGCTTTCGCAATTACAAGAACAATTTAATAAAAAT  
TTGCCCGAACCCACTGAAGGGTTTTGCTGCAGATGACGAGCCTACCACACCTGCTGAACTA  
GTGGGGAAATTCCTTGGCTACGTATCTTCTCTAGTCGAACCTTCCAAGGTCGGTCAATTC  
GATCAGGTCTTGAACCTTTGCTTAACAGAATTTGAAAACGTTATTTAGAAGGCAATGAC  
ATTCACGCCTTGGCTGCTAAACTATTACAGGAAAACGACACAACCTTTAGTGAAGACTAAA  
GAACTAATTAATAATATATTACCGCCAGAATAATGGCTAAGAGACCATTTGACAAAAAA  
TCCAACCTCTGCTCTTTTTAGGGCCGTCGGCGAGGGTAACGCACAATTTGGTAGCCATTTT  
GGTGGTCAAGGTAACACCGGACTACTTTGACGAATTGCGTGATCTATATCAAACCTTAT  
CATGTCTTAGTGGGAGATTTAATCAAGTTCTCCGCTGAAACTTTAAGTGAAGTGAATGAG  
ACTACTTTAGATGCTGAAAAGTCTTTACTCAAGGTTTAAACATATTGGAATGGTTGGAG  
AACCCTTCAAATACCCAGACAAGGACTATTTACTTTCCATTTCAATTTTCATGTCCCTTA  
ATTTGGTGTCAATCAATTTGGCTCACTACGTAGTTACTGCAAGCTTTTGGGTTTCACTCCA  
GGTGAGTTAAGATCTTACTTAAAAGGTGCTACAGGTCCTCAAGGTTTGGTTACTGCT  
GTCGCCATAGCTGAGACGGATTCTTGGGAATCCTTCTTTCGTCCTCGTAAGAAAGGCAATT  
ACTGTATTATTCTTCATCGGTGTTGTTGTTACGAAGCATAACCCAAACACTTCCCTACCA  
CCATCCATCTTGAAGATTCTTGGAAAACAATGAAGGTGTTCCATCTCCAATGTTGTCC  
ATTTCCAATCTAACTCAAGAACAAGTTCAAGACTATGTAAATAAGACTAACTCTCATTTG  
CCAGCTGGTAAACAAGTTGAAATTTCTCTAGTCAATGGTGCAGAAATCTAGTCGTATCG  
GGCCACCACAATCATTATATGGTTTTAACTTGACTTTAAGAAAGGCCAAGGCCCATCT  
GGACTGGATCAATCAAGAATCCCATTCAGCGAAAAGAAAATGAAGTTCTCCAATAGGTT  
TTACCTGTTGCATCACCATTCCATTCCCATCTATTGGTTCCAGCTTCAGATTTGATTAAC  
AAAGACTTAGTCAAAAACAATGTCAGCTTTAACGCTAAAGATATTCAAATCCCCGTTTAC  
GACACTTTTTGATGGTTCAGATCTAAGAGTCTTTTTCAGGTTCCATTTCCGAGAGAATCGTC  
GACTGCATCATTAGATTACCTGTCAAATGGGAAAACACTACTACACAATTCAAAGCCACCCAC  
ATATTAGACTTTGGTCCAGGTGGAGCTTCCGGTTTAGGTGTTTTAACCCATCGTAATAAAA  
GATGGTACTGGTGTTCGTGTTATCGTTGCCGGTACTCTCGACATTAACCCAGATGATGAT  
TACGGATTCAGCAAGAAATCTTTGATGTTACTAGTAATGGTTTGAAGAAAAATCCAAAC  
TGTTGGAAGAATAACCTCAAAAATTAATTAAGAACAATCAGGCAAAAATTTTGTGCAA  
ACAAAATTTCTAAATTAATCGGTAGACCACCTTTATTGGTTCTGGTATGACACCATGT  
ACTGTTTTCTCAGATTTTCGTAGCTACTACCACAATGCTGGTTATACCATTGAGTTGCC  
GGTGGTGGTTACTTTTTCCGACGAGGATGACCGCCGCTATTGATTCTGTGGTTTTCTCAG  
ATAGAAAAGGGTAGTACCTTCGGTATCAACTTGATCTACGTCAATCCATTTATGTTACAA  
TGGGGTATTCCATTAATCAAGGAACTAAGAAGCAAAGGTTATCCAATTCATTTGACC

ATTGGTGTGGTGTCCCATCATTGGAAGTTGCTAGTGAATACATAGAGACATTAGGTTTG  
AAGTACTTGGGTTTTGAAACCAGGTTCCATTGATGCTATTTTCGCAAGTTATAAACATTGCT  
AAAGCACATCCAAACTTCCCAATAGCTTTACAATGGACCGGTGGTAGAGGTGGTGGTCAT  
CATTCTTTTCGAAGATGCCACACTCCAATGTTACAAATGTACTCCAAGATTAGAAGACAT  
CCAAACATTATGTTGATATTCGGTTCTGGTTTTCGGTTCTGCTGATGACACTTACCCATAC  
TTAACCGGTGAATGGTCCACAAAATTCGATTATCCACCAATGCCATTTCGATGGTTTTCTA  
TTTGGTTCGAGGGTCATGATTGCTAAGGAAGTTAAAACCTCTCCTGATGCTAAGAAGTGT  
ATTGCTGCTTGTACTGGTGTTCCTGATGATAAATGGGAACAAACCTACAAGAAGCCAAC  
GGTGGTATTGCTACTGTTTCGCTCTGAAATGGGTGAACCAATTCACAAAATTGCCACTCGT  
GGTGTATGCTATGGAAGGAATTCGACGAAACCATCTTCAACTTACCAAAGAATAAGTTG  
GTACCAACTTTGGAAGCAAAGAGAGATTACATTATCTCAAGATTGAACGCCGATTTCCAA  
AAACCATGGTTTTGCTACCGTCAACGGTCAAGCCCGTGACCTAGCCACAATGACATACGAA  
GAAGTTGCAAAGAGATTGGTGGAAATTAATGTTTCATCAGATCTACCAACTCTTGGTTTTGAT  
GTCACATGGAGAACCTTTACTGGTGAATTTCTACGTCGTGTCGAAGAACGTTTCACTAAA  
AGTAAGACATTGTCTTTAATCCAATCCTATTCTCTACTAGACAAGCCTGATGAAGCTATT  
GAAAAAGTATTTAATGCTTATCCTGCCGCTAGGGAACAGTTCTTGAATGCGCAAGATATT  
GATCACTTTTTGAGCATGTGTCAAAATCCAATGCAAAAACAGTGCCTTTTGTCCAGTT  
TTGGATCGTAGATTCGAGATTTTTTTTTCAAAAAGATTTCGTTATGGCAATCTGAGCACTTG  
GAAGCCGTCGTCGACCAAGACGTTCAAAGAACATGTATCCTACATGGACCTGTTGCAGCA  
CAATTCATAAAGTCATCGATGAACCAATTAAGAGCATTATGGATGGTATTCACGATGGT  
CACATCAAAAAGTTACTACATCAATATTACGGTGACGATGAGTCAAAAGATTCCAGCAGTT  
GAGTACTTTGGTGGTGAAGCCCTGTAGACGTACAAAGTCAAGTTGATTCTTCTCTGTA  
TCTGAAGACTCAGCTGTTTTTAAGGCAACATCCTCTACTGATGAAGAAAGCTGGTTTTAAG  
GCTTTGGCGGGATCCGAAATTAAGTGGAGACATGCAAGTTTCTTATGTTTCTTTATCACT  
CAAGATAAAATGTTTTGTTTCTAACCCTAATAGAAAAGTTTTCAAGCCAAGCCAAGGAATG  
GTTGTTGAGATTTCCAAACGGCAATACTTCTTCAAAGACTGTTGTCACCTTTTCAGAACCT  
GTTCAAGGTGAATTTGAAACCAACTGTTATTTTGAAGTTGTTGAAGGAGAACATAATCCAA  
ATGGAATGATTGAGAACAGAACTATGGATGGTAAGCCCGTCAGCTTGCCATTGTTGTAC  
AACTTCAACCCAGATAATGGTTTTGCTCCAATCTCTGAAGTTATGGAGGACAGAAACCAA  
AGAATTAAGGAAATGTACTGGAAATTAATGGATTGATGAGCCTTTCAATTTGGACTTTGAC  
CCAAGAGATGTCATTAAGGGCAAAGATTTTCGAGATCACCGCTAAAGAAGTTTATGACTTT  
ACACACGCTGTTGGAACAATTTGTGAAGACTTCGTTTCTAGACCTGATAGAACGATGTTG  
GCCCCAATGGACTTTGCTATTGTTGTCGGATGGAGAGCCATCATCAAGGCCATTTTCCCT  
AATACGGTCGATGGTGACTTATTGAAGTTGGTTCATTTGTCTAACGGCTACAAGATGATT  
CCTGGCGCTAAGCCACTGCAAGTTGGTGTGTTGTTTCAACTACTGCTGTTATTGAATCT  
GTCGTCAACCAACCTACAGGAAAGATTGTCGATGTGGTAGGTACATTATCGAGAAATGGC  
AAGCCTGTATGGAAGTCACCTCCTCATTCTTCTACAGAGGCAACTATACTGACTTTGAA  
AACACTTTCCAAAAGACTGTTGAACCTGTTTATCAAATGCACATCAAAAACCTTCTAAAAGAT  
ATAGCTGTCTTGGCCTCTAAGGAGTGGTTCCAATTTGGACGATGAAGACTTCGATCTGTTA  
AACAAAACCTTTGACTTTGAAACTGAAACTGAAGTTACTTTCAAGAATGCTAACATCTTC  
TCTTCAGTGAAATGTTTTGGCCCAATTAAGTTGAATTGCCAACCAAAGAAACCGTGGAG  
ATCGGTATTGTCGATTACGAAGCCGGTGCCTCTCACGGTAACCCCTGTTGTTGATTTCTTG  
AAGAGAAACGGTTCCACATTTGGAACAAAAGTCAATCTAGAAAATCCTATTCCAATTGCA  
GTACTTGTATTGTCACACTCAAGTACCAAGTCAACGACATACGCTAGAGTTTCTGGTGATTG  
AATCCAATTCACGTTTTACGTCATTTTGCCTCTTACGCAAACTTGCCAGGTACTATCAGC  
CACGGTATGTTTTCTTCTGCTTCCGTCGCTTTGATTGAAAACCTGGGCTGCTGACAGT  
GTTTCATCCAGGGTACGTGGCTACACTTGTCAATTTGTTGACATGGTTTTGCTTAAACT  
GCTTTGAAAACATCGATTCAACATGTTGGTATGATCAATGGTAGAAAATTGATAAAGTTT  
GAACTAGAAATGAAGATGACGTTGTAGTTTTGACTGGTGAAGCCGAAATTAACAACCT  
GTTACTACCTTCGTTTTCACTGGTCAAGGTTTACAAGAACAAGGTATGGGTATGGACTTA  
TACAAAACCTTCTAAAGCTGCTCAAGATGTTTGAATAGAGCTGACAACCATTTCAAGGAC  
ACTTATGGTTTTCTCTATCTTAGACATTGTCATTAACAACCCAGTTAACTTAACAATTCAC  
TTCGGTGGTGAAGGGTAAGAGGATCAGAGAAAACCTATTCTGCTATGATCTTTGAGACT  
ATCGTGGATGGAATTTGAAGACTGAAAAAATTTTCAAGGAAATTAATGAGCACAGTACT  
TCTTACACATTTAGATCTGAAAAAGGTTTTATTGTCTGCTACTCAATTTACACAACCCAGCT  
TTAACTTTGATGGAAGGCTGCTTTTCGAAGACTTGAATCTAAAGGTTTTGATCCCAGCC  
GATGCTACTTTTGTGGTCACTCTTTAGGTGAGTATGCTGCTTTGGCCTCTTTGGCTGAT  
GTTATGTCTATCGAATCTTTAGTTGAAGTTGTGTTCTACAGAGGTATGACTATGCAAGTT  
GCTGTTCCAAGAGATGAGTTGGGCAGATCCAACATATGGTATGATTGCCATTAACCCAGGT  
AGAGTCGCTGCATCATTCTCTCAAGAAGCTTTGCAATATGTTGTTGAGAGAGTTGGTAAG  
AGAACC GGCTGGTTGGTTGAAATCGTCAACTACAACGTTGAAAACCAACAATATGTTGCA  
GCTGGTGTATCTAAGAGCTTTAGACACCGTTACCAATGTTCTAAACTTCATCAAATTACAA

AAAATTGATATTATTGAACTACAAAAGTCCTTATCTTTGGAAGAAGTTGAAGGTCATTTG  
TTTGAGATCATTGACGAAGCTTCCAAGAAATCTGCTGTCAAGCCTCGCCCACTTAAATTG  
GAGAGAGGTTTTGCTTGTATCCCATTAGTTGGTATTTCTGTTCCTTTTCCATTCCACCTAC  
TTGATGAATGGTGTAAACCATTCAAGAGTTTTCTTGAAGAAGAATATCATAAAAGAAAAT  
GTGAAGGTTGCTAGATTGGCCGGAAGTACATTCCAAACTTGACTGCAAAACCATTCAG  
GTTACTAAGGAATATTTCCAGGACGTTTATGATTTGACTGGCTCCGAACCTATCAAGGAA  
ATCATCGACAACGGGAAAAGGATGAATGGGGCAGCCCGGAAGTTGAGCAAGAATTAGCT  
CATATTTTGCTAACTGAATTGTTAGCTTATCAATTTGCCTCTCCTGTGAGATGGATTGAA  
ACTCAAGATGTTTTTTTTGAAGGATTTTAACTGAAAGGGTTGTTGAAATCGGTCCCTTCT  
CCAACCTTTGGCTGGGATGGCTCAAAGAACCTTGAAGAATAAATACGAATCTTACGATGCT  
GCTCTGTCTTTACATAGAGAAATCTTATGCTATTTCGAAGGATGCCAAAAGAGATTTATTAT  
ACCCAGATCCATCCGAACCTAGCTGCAAAGGAAGAGCCCGCTAAGGAAGAAGCTCCTGCT  
CCAACCTCCAGCTGCTAGTGTCTGCTCCTGCAGCAGCAGCCCCAGCTCCCGTCGCGGCA  
GCAGCCCCAGCTGCAGCAGCTGCTGAGATTGCCGATGAACCTGTCAAGGCTTCCCTATTG  
TTGCACGTTTTGGTTGCTCACAAGTTGAAGAAGTCGTTAGATTCCATTCCAATGTCCAAG  
ACAATCAAAGACTTGGTCGGTGGTAAATCTACAGTCCAAAATGAAATTTTTGGGTGATTTA  
GGTAAAGAATTTGGTACTACTCCTGAAAAACCAGAAGAACTCCATTAGAAGAATTGGCA  
GAAACTTTCCAAGATACCTTCTCTGGAGCATTGGGTAAGCAATCTTCTCGTTATTATCA  
AGATTAATCTCATCTAAGATGCCTGGTGGGTTACTATTACTGTGCTAGAAAATACTTA  
CAAACCTCGCTGGGGACTACCATCTGGTAGACAAGATGGTGTCTTTTTGGTAGCTTTATCT  
AACGAGCCTGCTGCTCGTCTAGGTTCTGAAGCTGATGCCAAGGCTTTCTTGGACTCCATG  
GCTCAAAAATACGCTTCCATTGTTGGTGTGACTTATCATCAGCTGCTAGCGCTAGTGGT  
GCTGCCGGTGCAGGTGCTGCTGCCGGTGCAGCTATGATCGATGCTGGCGCTCTGGAAGAA  
ATAACCAAAGACCACAAGTTTTGGCGCGTCAACAACCTGCAAGTATTGGCTCGTTATCTA  
AAAATGGACTTGGATAACGGTGAAGAAGGTTCTTGAAGAAGAAAGGACACTGTTGCTGAA  
CTTCAAGCTAGTTGGATTACTTGAATGCGAATTAGGTGAATCTTTGTTAACGGTGT  
GCTACTTCTTCTCTAGAAAAAAGGCCAGAACCTTCGATTCTTCTGGAACGGGCTAAA  
CAATCTTTATTATCATTATACTTTGAGATAATTCATGGTGTCTTGAAAAACGTTGATAGA  
GAGGTTGTTAGTGAAGCTATCAATATCATGAACAGATCTAACGATGCTTTGATTAAATTC  
ATGGAATACCATATCTCTAACACTGATGAAAACAAAAGGTGAAAACTATCAATTGGTTAAA  
ACTCTTGGTGAGCAGTTGATTGAAAACGTAAACAAGTTTTGGATGTTGATCCAGTTTAC  
AAAGATGTTGCTAAGCCTACCGGTCCAAAACCTGCTATTGACAAGAACGGTAACATTACA  
TACTCAGAAGAGCCAAGAGAAAAGGTTAGGAAATTATCTCAATACGTACAAGAAATGGCC  
CTTGGTGGTCCAATCACCAGAATCTCAACCTACTATTGAAGAGGATTTGACTCGTGT  
TACAAGGCAATCAGTGTCAAGCTGATAAACAAGATATTTCCAGCTCCACCAGGGTTGAA  
TTTGAAAAACCTATATAGTGAATTTGATGAAGTCTTGGAAAGCTCCAAAGAAATCGATCCT  
TCTCAAACAACCCAATTGGCCGGTATGGATGTTGAGGATGCTTTGGACAAAAGATTCCACC  
AAAGAAGTTGCTTCTTTGCCAAACAAATCTACCATTTCTAAGACGGTATCTTCAACTATT  
CCAAGAGAAACTATTCCGTTCTTACATTTGAGAAAAGAAGACTCCTGCCGGAGATTGGAAA  
TATGACCGCCAATTGTCTTCTCTTTCTTAGATGGTTTAGAAAAGGCTGCCTTCAACGGT  
GTCACCTTCAAGGACAAATACGTCTTGATCACTGGTGTGTAAGGGTTCTATTGGTGT  
GAAGTCTTGAAGGTTTTGTTACAAGGTGGTGTAAAGGTTGTTGTTACCACCTCTCGTTT  
TCTAAGCAAGTTACGACTACTACCAATCCATTTACGCCAAATATGGTGTAAAGGTTCT  
ACTTTGATTTGTTCCATTTCAACCAAGGTTCTAAGCAAGACGTTGAAGCTTTGATTGAA  
TTTATCTACGACTGAAAAGAATGGTGGTTTTAGGTTGGGATCTAGATGCTATTATTCCA  
TTCGCGGCCATTCCAGAACAAGGATTTGAATTAGAACATATTGATTCTAAGTCTGAATTT  
GCTCATAGAATCATGTTGACCAATATCTTAAGAATGATGGGTTGTGTCAAGAAGCAAAAA  
TCTGCAAGAGGATTGAAAACAAGACCAGCTCAAGTCATTCTACCAATGTCTCCAAACCAT  
GGTACTTTCCGGTGGTGTGATGGTATGTATTAGAATCCAAGTTGTCTTTGAAAACCTTTGTT  
AACAGATGGCACTCTGAATCCTGGGCCAATCAATTAACCGTTTGCAGGCTATTATTGGT  
TGGACTAGAGGACTGTTTTAATGAGCGCTAATAACATCATTGCTGAAGGCATTGAAAAG  
ATGGGTGTTTCGACTTTCTCTCAAAGGAAATGGCTTTCAACTTATTGGGTCTATTGACT  
CCAGAAGTCGTAGAATTGTGCCAAAATCACCTGTTATGGCTGACTTGAATGGTGGTTG  
CAATTTGTTCTGAATTGAAGGAATTCAGTCTAAATTCGCTAAAGAGTTGGTTGAAACT  
TCTGAAGTTAGAAAGGCAGTTTTCCATCGAAACTGCTTTGGAGCATAAGGTTGTCAATGGC  
AATAGCGCTGATGCTGCATATGCTCAAGTCGAAATTCACCAAGAGCTAACATTCAACTG  
GACTTCCCAGAATTGAAACCATACAAACAGGTTAAACAAATTTGCTCCCCTGAGCTTGAA  
GGTTTGTGGATTTGGAAGAGTTATTGTAGTTACCGGTTTTGCTGAAGTCGGCCCATGG  
GGTTCGGCCAGAACAAGATGGGAAATGGAAGCTTTTGGTGAATTTTCGTTGGAAGGTTGC  
GTTGAAATGGCCTGGATTATGGGCTTCATTTACATACCATAACGGTAATTTGAAGGGTCG  
CCATACACTGGTTGGTTGATTCCAAAACAAAAGAACCAGTTGATGACAAGGACGTTAAG  
GCCAAGTATGAAACATCAATCCTAGAACACAGTGGTATCAGATTGATCGAACCAGAGTTA

TTCAATGGTTACAACCCAGAAAAGAAGGAAATGATTCAAGAAGTCATTGTCTGAAGAAGAC  
TTGGAACCATTTGAGGCTTCGAAGGAAACTGCCGAACAATTTAAACACCAACATGGTGAC  
AAAGTGGATATCTTCGAAATCCCAGAAACAGGAGAGTACTCTGTTAAGTTACTAAAGGGT  
GCCACTTTTATACATTCCAAAGGCTTTGAGATTTGACCGTTTGGTTGCAGGTCAAATTTCCA  
ACTGGTTGGAATGCTAAGACTTATGGTATCTCTGATGATATCATTCTCAGGTTGACCCA  
ATCACATTATTCGTTTTGGTCTCTGTTGTGGAAGCATTATTGCATCTGGTATCACCGAC  
CCATACGAAATGTACAAATACGTACATGTTTCTGAGGTTGGTAACTGTTCTGGTTCTGGT  
ATGGGTGGTGTTCCTGCCTTACGTGGTATGTTTAAGGACCGTTTCAAGGATGAGCCTGTC  
CAAAATGATTTTACAAGAATCATTATCAACACCATGTCCGCTTGGGTTAATATGTTG  
TTGATTTCCCTCATCTGGTCCAATCAAGACACCTGTTGGTGCCTGTGCCACATCCGTGGAA  
TCTGTTGACATTGGTGTAGAAACCATCTTGTCTGGTAAGGCTAGAATCTGTATTGTCTGGT  
GGTTACGATGATTTCCAAGAAGAAGGCTCCTTTGAGTTCGGTAACATGAAGGCCACTTCC  
AACACTTTGGAAGAATTTGAACATGGTTCGTACCCAGCGGAAATGTCCAGACCTGCCACC  
ACTACCCGTAACGGTTTTATGGAAGCTCAAGGTGCTGGTATTCAAATCATCATGCAAGCT  
GATTTAGCTTTGAAGATGGGTGTGCCAATTTACGGTATTGTTGCCATGGCTGCTACCGCC  
ACCGATAAGATTGGTAGATCTGTGCCAGCTCCAGGTAAGGGTATTTTAACCACTGCTCGT  
GAACACCACTCCAGTGTAAAGTATGCTTCACCAAACCTTGAACATGAAGTACAGAAAGCGC  
CAATTTGGTTACTCGTGAAGCTCAGATTAAGATTGGGTAGAAAACGAATTGGAAGCTTTG  
AAGTTGGAGGCCGAAGAAATTTCAAGCGAAGACCAAAAACGAGTCTTACTTGAACGTACC  
AGAGAAATCCACAACGAAGCTGAAAGTCAATTGAGAGCTGCACAACAACAATGGGGTAAAC  
GACTTCTACAAGAGGGACCCACGTATTGCTCCATTGAGAGGAGCACTGGCTACTTACGGT  
TTAACTATTGATGACTTGGGTGTGCTTTCATTCCACGGTACATCCACAAAGGCTAATGAC  
AAGAACGAATCTGCCACAATTAATGAAATGATGAAGCATTGGGTAGATCTGAAGGTAAT  
CCCGTCAATGGTGTTCCTCAAAGTTCTTGACTGGTTCATCCAAAGGGTGTGCTGGTGCA  
TGGATGATGAATGGTGTCTTTGCAAATTTCTAAACAGTGGTATTATTCCAGGTAACCGTAAC  
GGTATAACCTGGATAAGATCTTTGGAGCAATTTGAATACGCTTTGTACCCATCCAAGACT  
TTAAAGACCGAGGTGTAGAGCCGTGTCCATCACTTCTTTTCGGTTTTGGTCAAAGGGT  
GGTCAAGCTATTGTGGTTCATCCAGACTACTTATACGGTGTATCACTGAAGACAGATAC  
AACGAGTATGTCGCCAAGGTTAGTGCCAGAGAGAAAAGTGCCTACAAATTCCTCCATAAT  
GGTATGATCTACAACAAGTTGTTTCGTAAGTAAAGAGCATGCTCCATACACTGATGAATTG  
GAAGAGGATGTTTACTTGGACCCATTAGCCCGTGTATCTAAGGATAAGAAATCAGGCTCC  
TTGACTTTCAACTCTAAAAACATCCAAAGCAAGGACAGTTACATCAATGCTAACACCATT  
GAAACTGCCAAGATGATTGAAAACATGACCAAGGAGAAAGTCTCTAACGGTGGCGTCGGT  
GTAGATGTTGAATTAATCACTAGCATCAACGTTGAAAATGATACTTTTATCGAGCGCAAT  
TTCACCCCGCAAGAAATAGAGTACTGCAGCGCGCAGCCTAGTGTGCAAAGCTCTTTCGCT  
GGGACATGGTCCGCCAAAGAGGCTGTTTTCAAGTCTTAGGCGTCAAGTCTTAGGCGGT  
GGTGTGCTGATTGAAAGACATCGAAATCGTACGCGTTAACAAAAACGCTCCAGCCGTTGAA  
CTGCACGGTAACGCCAAAAGGCTGCCGAAGAAGCTGGTGTACCGATGTGAAGGTATCT  
ATTTCTCACGATGACCTCCAAGCTGTGCGGGTTCGCCGTTTCTACTAAGAAATAG

>codon-optimized fusFAS, CAI change: 0.29 > 0.97

ATGGACGCTTACTCTACTAGACCATTGACTTTGTCTCACGGTTCCTTTGGAACACGTTTTG  
TTGGTTCCAACGCTTCTTTCTTCATCGCTTCTCAATTGCAAGAACAATTCACAAGATC  
TTGCCAGAACCAACTGAAGGTTTCGCTGCTGACGACGAACCAACTACTCCAGCTGAATTG  
GTTGGTAAGTTCTTGGGTTACGTTTCTTCTTTGGTTGAACCATCTAAGGTTGGTCAATTC  
GACCAAGTTTTGAACTTGTGTTGACTGAATTCGAAAACGTTACTTGGAAAGGTAACGAC  
ATCCACGCTTTGGCTGCTAAGTTGTTGCAAGAAAACGACACTACTTTGGTTAAGACTAAG  
GAATTGATCAAGAACTACATCACTGCTAGAATCATGGCTAAGAGACCATTTCGACAAGAAG  
TCTAACTCTGCTTTGTTTCAAGACTGTTGGTGAAGGTAACGCTCAATTGGTTGCTATCTTC  
GGTGGTCAAGGTAACACTGACGACTACTTTCGAAGAATTGAGAGACTTGTACCAAACCTTAC  
CACGTTTTGGTTGGTGACTTGATCAAGTTCTCTGCTGAAAACCTTTGTCTGAATTGATCAGA  
ACTACTTTGGACGCTGAAAAGGTTTTCACTCAAGGTTTGAACATCTTGGAAATGGTTGGAA  
AACCCATCTAACACTCCAGACAAGGACTACTTGTGTCTATCCCAATCTCTTGTCCATTG  
ATCGGTGTTATCCAATTGGCTCACTACGTTGTTACTGCTAAGTTGTTGGGTTTCACTCCA  
GGTGAATTGAGATCTTACTTGAAGGGTGTACTGGTCACTCTCAAGGTTTGGTTACTGCT  
GTTGCTATCGTGAACACTGACTCTTGGGAATCTTTCTTCGTTTCTGTTAGAAAAGGCTATC  
ACTGTTTTGTTCTTTCATCGGTGTAGATGTTACGAAGCTTACCCAAACACTTCTTTGCCA  
CCATCTTACTTGGAAAGACTCTTTGGAAAACAACGAAGGTGTTCCATCTCCAATGTTGTCT  
ATCTCTAACTTACTCAAGAACAAGTTCAAGACTACGTTAACAAAGACTAACTCTCACTTG  
CCAGCTGGTAAGCAAGTTGAAATCTCTTTGGTTAACGGTGTAAAGAACTTGGTTGTTTCT  
GGTCCACCACAATCTTTGTACGGTTTTGAACTTACTTTGAGAAAAGGCTAAGGCTCCATCT

GGTTTGGACCAATCTAGAATCCCATTTCTCTGAAAGAAAGTTGAAGTTCTCTAACAGATTC  
TTGCCAGTTGCTTCTCCATTCCACTCTCACTTGTGGTTCCAGCTTCTGACTTGATCAAC  
AAGGACTTGGTTAAGAACAACGTTTCTTTCAACGCTAAGGACATCCAAATCCCAGTTTAC  
GACACTTTTCGACGGTCTGACTTGAGAGTTTTGTCTGGTTCTATCTCTGAAAAGAAATCGTT  
GACTGTATCATCAGATTGCCAGTTAAGTGGGAAACTACTACTCAATTCAAGGCTACTCAC  
ATCTTGGACTTCGGTCCAGGTGGTGTCTTGGTTTGGGTGTTTTGACTCACAGAAACAAG  
GACGGTACTGGTGTAGAGTTATCGTTGCTGGTACTTTGGACATCAACCCAGACGACGAC  
TACGGTTTCAAGCAAGAAATCTTCGACGTTACTTCTAACGGTTTGAAGAAGAACCCAAAC  
TGGTTGGAAGAATACCACCCAAAGTTGATCAAGAACAAGTCTGGTAAGATCTTCGTTGAA  
ACTAAGTTCTCTAAGTTGATCGGTAGACCACCATTGTTGGTTCCAGGTATGACTCCATGT  
ACTGTTTCTCCAGACTTCGTTGCTGCTACTACTAACGCTGGTTACACTATCGAATTGGCT  
GGTGGTGGTTACTTCTCTGCTGCTGGTATGACTGCTGCTATCGACTCTGTTGTTTTCTCAA  
ATCGAAAAGGGTTTACTTTTCGGTATCAACTTGATCTACGTTAACCCATTTCATGTTGCAA  
TGGGGTATCCCATTTGATCAAGGAATTGAGATCTAAGGGTTACCCAATCCAATTCTTGACT  
ATCGGTGCTGGTGTTCATCTTTGGAAGTTGCTTCTGAATACATCGAACTTTGGGTTTG  
AAGTACTTGGGTTTGAAGCCAGGTTCTATCGACGCTATCTCTCAAGTTATCAACATCGCT  
AAGGCTCACCCAACTTCCCAATCGCTTTGCAATGGACTGGTGGTAGAGGTGGTGGTCAC  
CACTCTTTGCAAGACGCTCACACTCCAATGTTGCAAATGTACTCTAAGATCAGAAGACAC  
CCAAACATCATGTTGATCTTCGGTTCTGGTTTTCGGTTCTGCTGACGACACTTACCCATAC  
TTGACTGGTGAATGGTCTACTAAGTTTCGACTACCCACCAATGCCATTTCGACGGTTTTCTTG  
TTCGGTTCTAGAGTTATGATCGCTAAGGAAGTTAAGACTTCTCCAGACGCTAAGAAGTGT  
ATCGCTGCTTGTACTGGTGTTCAGACGACAAGTGGGAACAACTTACAAGAAGCCAACT  
GGTGGTATCGTTACTGTTAGATCTGAAATGGGTGAACCAATCCACAAGATCGCTACTAGA  
GGTGTATGTTGTGGAAGGAATTCGACGAACTATCTTCAACTTGCCAAAGAACAAGTTG  
GTTCCAACTTTTGGAAGCTAAGAGAGACTACATCATCTCTAGATTGAACGCTGACTTCCAA  
AAGCCATGTTTCGACTACTGTTAACGGTCAAGCTAGAGACTTGGCTACTATGACTTACGAA  
GAAGTTGCTAAGAGATTGGTTGAATTGATGTTTCATCAGATCTACTAACTCTTGGTTCGAC  
GTTACTTGGAGAACTTTCCTGCTGCTTCTTGAAGAAGTTGAAGAAGATTCACTAAG  
TCTAAGACTTTGTCTTTGATCCAATCTTACTCTTTGTTGGACAAGCCAGACGAAGCTATC  
GAAAAGGTTTTTCAACGCTTACCCAGCTGCTAGAGAACAATTTTGAACGCTCAAGACATC  
GACCCTTCTTGTCTATGTGTCAAAAACCAATGCAAAAAGCCAGTTCCATTTCGTTCCAGTT  
TTGGACAGAAGATTCGAAATCTTCTTCAAGAAGGACTCTTTGTGGCAATCTGAACACTTG  
GAAGCTGTTGTTGACCAAGACGTTCAAAGAACTTGTATCTTGCACGGTCCAGTTGCTGCT  
CAATTCCTAAGGTTATCGACGAACCAATCAAGTCTATCATGGACGGTATCCACGACGGT  
CACATCAAGAAGTTGTTGCACCAATACTACGGTGACGACGAATCTAAGATCCCAGCTGTT  
GAATACTTCGGTGGTGAATCTCCAGTTGACGTTCAATCTCAAGTTGACTCTTCTTCTGTT  
TCTGAAGACTCTGCTGTTTTCAAGGCTACTTCTTCTACTGACGAAGAATCTTGGTTCAAG  
GCTTTGGCTGGTTCTGAAATCAACTGGAGACACGCTTCTTTCTTGTGTTCTTTTCATCACT  
CAAGACAAGATGTTTCGTTTCTAACCCAATCAGAAAAGGTTTTTCAAGCCATCTCAAGGTATG  
GTTGTTGAAATCTCTAACGGTAACACTTCTTCTAAGACTGTTGTTACTTTGTCTGAACCA  
GTTCAAGGTGAATTGAAGCCAACACTGTTATCTTGAAGTTGTTGAAGGAAAACATCATCAA  
ATGGAAATGATCGAAAACAGAACTATGGACGGTAAGCCAGTTTCTTTGCCATTGTTGTAC  
AACTTCAAGCCAGACACTGGTTTTTCGCTTCCAATCTCTGAAGTTATGGAAGACAGAAACCAA  
AGAATTCAAGGAAATGTACTGGAAGTTGTGGATCGACGAACCAATTCAACTTGGACTTCGAC  
CCAAGAGACGTTATCAAGGGTAAGGACTTCGAAATCACTGCTAAGGAAGTTTACGACTTC  
ACTCACGCTGTTGGTAACAACACTGTGAAGACTTCGTTTTCTAGACCAGACAGAACTATGTTG  
GCTCCAATGGACTTCGCTATCGTTGTTGGTTGGAGAGCTATCATCAAGGCTATCTTCCCA  
AACACTGTTGACGGTGACTTGTGGAAGTTGGTTCACTTGTCTAACGGTTACAAGATGATC  
CCAGGTGCTAAGCCATTGCAGGTTGGTGACGTTGTTTCTACTACTGCTGTTATCGAATCT  
GTTGTTAACCAACCAACTGGTAAGATCGTTGACGTTGTTGGTACTTTGTCTAGAAACGGT  
AAGCCAGTTATGGAAGTTACTTCTTCTTTCTTCTACAGAGGTAACACTACTGACTTCGAA  
AACACTTTCCAAAAGACTGTTGAACCAGTTTACCAAATGCACATCAAGACTTCTAAGGAC  
ATCGCTGTTTTGAGATCTAAGGAATGGTTCCAATTGGACGACGAAGACTTCGACTTGTTG  
AACAAGACTTTGACTTTGAAACTGAAACTGAAGTTACTTTCAAGAACGCTAACATCTTC  
TCTTCTGTTAAGTGTTCGGTCCAATCAAGGTTGAATTGCCAACTAAGGAAACTGTTGAA  
ATCGGTATCGTTGACTACGAAGCTGGTGCTTCTCACGGTAACCCAGTTGTTGACTTCTTG  
AAGAGAAACGGTTTCTACTTTGGAACAAAAGGTTAACTTGGAAAACCCAATCCAATCGCT  
GTTTTGGACTCTTACTCCATCTACTAACGAACCATAACGCTAGAGTTTCTGGTGACTTG  
AACCCAATCCACGTTTCTAGACACTTCGCTTCTTACGCTAACTTGCAGGTACTATCACT  
CACGGTATGTTCTTCTGCTTCTGTTAGAGCTTTGATCGAAAACCTGGGCTGCTGACTCT  
GTTTCTTCTAGAGTTAGAGGTTACACTTGTCAATTGCTTGGATGATGTTTGGCAAACACT  
GCTTTGAAGACTTCTATCCAACACGTTGGTATGATCAACGGTAGAAAAGTTGATCAAGTTC

GAAACTAGAAACGAAGACGACGTTGTTGTTTTGACTGGTGAAGCTGAAATCGAACCAACCA  
GTTACTACTTTTCGTTTTCTACTGGTCAAGGTTCTCAAGAACAAGGTATGGGTATGGACTTG  
TACAAGACTTCTAAGGCTGCTCAAGACGTTTTGGAACAGAGCTGACAACCACTTCAAGGAC  
ACTTACGGTTTTCTCTATCTTGGACATCGTTATCAACAACCCAGTTAACTTGACTATCCAC  
TTCGGTGGTGAAGGGTAAGAGAATCAGAGAAAACACTCTGCTATGATCTTCGAAACT  
ATCGTTGACGGTAAGTTGAAGACTGAAAAGATCTTCAAGGAAATCAACGAACACTCTACT  
TCTTACACTTTTCAGATCTGAAAAGGGTTTTGTTGTCTGCTACTCAATTCCTCAACCAGCT  
TTGACTTTGATGGAAAAGGCTGCTTTTCGAAGACTTGAAGTCTAAGGGTTTGATCCCAGCT  
GACGCTACTTTTCGCTGGTCACTCTTTGGGTGAATACGCTGCTTTGGCTTCTTTGGCTGAC  
GTTATGTCTATCGAATCTTTGGTTGAAGTTGTTTTCTACAGAGGTATGACTATGCAAGTT  
GCTGTTCCAAGAGACGAATTGGGTAGATCTAACTACGGTATGATCGCTATCAACCCAGGT  
AGAGTTGCTGCTTCTTTCTCTCAAGAAGCTTTGCAATACGTTGTTGAAAAGAGTTGGTAAG  
AGAAGTGGTTGGTTGGTTGAAATCGTTAACTACAACGTTGAAAACCAACAATACGTTGCT  
GCTGGTGACTTGAGAGCTTTGGACACTGTTACTAACGTTTTGAACTTCATCAAGTTGCAA  
AAGATCGACATCATCGAATTGCAAAAGTCTTTGTCTTTGGAAGAAGTTGAAGGCTCACTTG  
TTCGAAATCATCGACGAAGCTTCTAAGAAGTCTGCTGTTAAGCCAAGACCATTGAAGTTG  
GAAAGAGGTTTTCGCTTGTATCCATTGGTTGGTATCTCTGTTCCATTCCACTCTACTTAC  
TTGATGAACGGTGTAAAGCCATTCAAGTCTTTCTTGAAGAAGAACATCATCAAGGAAAAC  
GTTAAGGTTGCTAGATTGGCTGGTAAGTACATCCCAAACCTTGACTGCTAAGCCATTCCAA  
GTTACTAAGGAATACTTCCAAGACGTTTACGACTTGACTGGTTCTGAACCAATCAAGGAA  
ATCATCGACAACCTGGGAAAAGGACGAATGGGGTTCTCCAGAAGTTGAACAAGAATTGGCT  
CACATCTTGTGACTGAATTGTTGGCTTACCAATTTCGCTTCTCCAGTTAGATGGATCGAA  
ACTCAAGACGTTTTCTTGAAGGACTTCAACACTGAAAGAGTTGTTGAAATCGGTCCATCT  
CCAACCTTTGGCTGGTATGGCTCAAAGAACCTTTGAAGAACAAGTACGAATCTTACGACGCT  
GCTTTGTCTTTGCACAGAGAAAATCTTGTGTTACTCTAAGGACGCTAAGGAAAATCTACTAC  
ACTCCAGACCCATCTGAATTGGCTGCTAAGGAAGAACCAGCTAAGGAAGAAGCTCCAGCT  
CCAACTCCAGCTGCTTCTGCTCCAGCTCCAGCTGCCGCTGCCAGCTCCAGTTGCTGCC  
GCCGCTCCAGCTGCTGCTGCTGCTGAAATCGCTGACGAACCAGTTAAGGCTTCTTTGTTG  
TTGCACGTTTTGGTTGCTCACAAGTTGAAGAAGTCTTTGGACTCTATCCCAATGTCTAAG  
ACTATCAAGGACTTGGTTGGTGGTAAGTCTACTGTTCAAAAACGAAATCTTGGGTGACTTG  
GGTAAGGAATTCGGTACTACTCCAGAAAAGCCAGAAGAACTCCATTGGAAGAATTGGCT  
GAACTTTCCAAGACACTTTCTCTGGTGCTTTGGGTAAGCAATCTTCTTCTTTGTTGTCT  
AGATTGATCTCTTCTAAGATGCCAGGTGGTTTTCACTATCACTGTTGCTAGAAAAGTACTTG  
CAAAGTACTAGTGGGTTTTGCCATCTGGTAGACAAGACGGTGTTTTTGTTGGTTGCTTTGTCT  
AACGAACCAGCTGCTAGATTGGGTTCTGAAGCTGACGCTAAGGCTTTCTTGGACTCTATG  
GCTCAAAAGTACGCTTCTATCGTTGGTGTGACTTGTCTTCTGCTGCTTCTGCTTCTGGA  
GCTGCTGGTGCTGGTGCTGCTGCTGGCGCTGCTATGATCGACGCTGGTGTCTTTGGAAGAA  
ATCATAAGGACCACAAGGTTTTGGCTAGACAACAATTGCAAGTTTTGGCTAGATACTTG  
AAGATGGACTTGGACAACGGTGAAGAAAAGTTCTTGAAGGAAAAGGACACTGTTGCTGAA  
TTGCAAGCTCAATTGGACTACTTGAACGCTGAATTGGGTGAATTCTTCGTTAACGGTGT  
GCTACTTCTTTTCAGTAGAAAAGGCTAGAATTTTCGACTCTTCTTGGAACTGGGCTAAG  
CAATCTTTGTTGTCTTTGTACTTCGAAATCATCCACGGTGTTTTTGAAGAACGTTGACAGA  
GAAGTTGTTTTCTGAAGCTATCAACATCAACATGAACAGATCAACGACGCTTTGATCAAGTTC  
ATGGAATACCACCTCTAACACTGACGAAACTAAGGGTGAAAAACCTACCAATTGGTTAAG  
ACTTTGGGTGAACAATTGATCGAAAACCTGTAAGCAAGTTTTGGACGTTGACCCAGTTTAC  
AAGGACGTTGCTAAGCCAACCTGGTCCAAAGACTGCTATCGACAAGAACGGTAACATCACT  
TACTCTGAAGAACCAAGAGAAAAGGTTAGAAAAGTTGTCTCAATACGTTCAAGAAAATGGCT  
TTGGGTGGTCCAATCACTAAGGAATCTCAACCAACTATCGAAGAAGACTTGACTAGAGTT  
TACAAGGCTATCTCTGCTCAAGCTGACAAGCAAGACATCTTCTTCTACTAGAGTTGAA  
TTCGAAAAGTTGACTCTGACTTGATGAAGTTCTTGAATCTTCTAAGGAAAATCGACCCA  
TCTCAAACACTCAATTGGCTGGTATGGACGTTGAAGACGCTTTGGACAAGGACTCTACT  
AAGGAAGTTGCTTCTTTGCCAAACAAGTCTACTATCTCTAAGACTGTTTCTTCTACTATC  
CCAAGAGAAAACCTATCCATTCTTGCACCTGAGAAAAGAAGACTCCAGCTGGTGACTGGAAG  
TACGACAGACAATTGTCTTCTTTGTTCTTGGACGGTTTTGAAAAGGCTGCTTTCAACGGT  
GTTACTTTTCAAGGACAAGTACGTTTTTGATCACTGGTGTGTTAAGGGTTCTATCGGTGCT  
GAAGTTTTGCAAGGTTTGTGCAAGGTGGTGTGTAAGGTTGTTGTTACTACTTCTAGATTC  
TCTAAGCAAGTTACTGACTACTACCAATCTATCTACGCTAAGTACGGTGTGTAAGGGTTCT  
ACTTTGATCGTTGTTCCATTCAACCAAGGTTCTAAGCAAGACGTTGAAGCTTTGATCGAA  
TTCATCTACGACACTGAAAAGAACGGTGGTTTTGGGTTGGGACTTGGACGCTATCATCCCA  
TTCGCTGCTATCCAGAACAAGGTATCGAATTGGAACACATCGACTCTAAGTCTGAATTC  
GCTCACAGAATCATGTTGACTAACATCTTGAGAATGATGGGTTGTGTTAAGAAGCAAAAAG  
TCTGCTAGAGGTATCGAAACTAGACCAGCTCAAGTTATCTTGCCAATGTCTCCAAACCAC



GGTACTTTTCGGTGGTGACGGTATGTACTCTGAATCTAAGTTGTCTTTGGAACTTTGTTC  
AACAGATGGCACTCTGAATCTTGGGCTAACCAATTGACTGTTTGTGGTGTATCATCGGT  
TGGACTAGAGGTACTGGTTTTGATGTCTGCTAACCAACATCATCGCTGAAGGTATCGAAAAG  
ATGGGTGTTAGAAGTTTCTCTCAAAAGGAAATGGCTTTCAACTTGTGGGTTTGTGACT  
CCAGAAGTTGTTGAATTGTGTCAAAAGTCTCCAGTTATGGCTGACTTGAACGGTGGTTTG  
CAATTCGTTCCAGAATTGAAGGAATTCACTGCTAAGTTGAGAAAGGAATTGGTTGAAACT  
TCTGAAGTTAGAAAGGCTGTTTCTATCGAACTGCTTTGGAACACAAGGTTGTTAACGGT  
AACTCTGCTGACGCTGCTTACGCTCAAGTTGAAATCCAACCAAGAGCTAACATCCAATTG  
GACTTCCCAGAATTGAAGCCATAACAAGCAAGTTAAGCAAATCGCTCCAGCTGAATTGGAA  
GGTTTGTGGACTTGGAAAGAGTTATCGTTGTTACTGGTTTCGCTGAAGTTGGTCCATGG  
GGTTCTGCTAGAAGTATAGATGGGAAATGGAAGCTTTTCGGTGAATTCTCTTTGGAAGGTTGT  
GTTGAAATGGCTTGGATCATGGGTTTTCTCTTACCACAACGGTAACTTGAAGGGTAGA  
CCATACACTGGTTGGGTTGACTCTAAGACTAAGGAACCAGTTGACGACAAGGACGTTAAG  
GCTAAGTACGAACTTCTATCTTGGAACTCTGGTATCAGATTGATCGAACCAGAATTG  
TTCAACGGTTACAACCCAGAAAAGAAGGAAATGATCCAAGAAGTTATCGTTGAAGAAGAC  
TTGGAACCATTGCAAGCTTCTAAGGAACTGCTGAACAATTCAAGCACCAACACGGTGAC  
AAGGTTGACATCTTCGAAATCCCAGAACTGGTGAATACTCTGTTAAGTTGTTGAAGGGT  
GCTACTTTGTACATCCCAAAGGCTTTGAGATTCGACAGATTGGTTGCTGGTCAAATCCCA  
ACTGGTTGGAACGCTAAGACTTACGGTATCTCTGACGACATCATCTCTCAAGTTGACCCA  
ATCACTTTGTTGTTTTGGTTTTCTGTTGTTGAAGCTTTTCATCGCTTCTGGTATCACTGAC  
CCATACGAAATGTACAAGTACGTTACGTTTTCTGAAGTTGGTAACTGTTCTGGTTCTGGT  
ATGGGTGGTGTTCGGCTTTGAGAGGTATGTTCAAGGACAGATTCAAGGACGAACCAGTT  
CAAAACGACATCTTGAAGAATCTTTCATCAACACTATGTCTGCTTGGGTTAACATGTTG  
TTGATCTCTTCTTCTGGTCCAATCAAGACTCCAGTTGGTGCTTGTGCTACTTCTGTTGAA  
TCTGTTGACATCGGTGTTGAAACTATCTTGTCTGGTAAGGCTAGAATCTGTATCGTTGGT  
GGTTACGACGATCCAAGAAGAAGGTTCTTTGCAATTCGGTAACATGAAGGCTACTTCT  
AACACTTTGGAAGAATCGAACACGGTAGAAGTCCAGCTGAAATGTCTAGACCAGCTACT  
ACTACTAGAAACGGTTTTCTGGAAGCTCAAGGTGCTGGTATCCAAATCATCATGCAAGCT  
GACTTGGCTTTGAAGATGGGTGTTCCAATCTACGGTATCGTTGCTATGGCTGCTACTGCT  
ACTGACAAGATCGGTAGATCTGTTCCAGCTCCAGGTAAGGGTATCTTGACTACTGCTAGA  
GAACACCCTCTTCTGTTAAGTACGCTTCTCCAACTTGAACATGAAGTACAGAAAAGAGA  
CAATTGGTTACTAGAGAAGCTCAAATCAAGGACTGGGTTGAAAACGAATTGGAAGCTTTG  
AAGTTGGAAGCTGAAGAAATCCCATCTGAAGACCAAAAACGAATTCTTGTGGAAAGAACT  
AGAGAAATCCACAACGAAGCTGAATCTCAATTGAGAGCTGCTCAACAACAATGGGGTAAC  
GACTTCTACAAGAGAGACCCAAGAATCGCTCCATTGAGAGGTGCTTTGGCTACTTACGGT  
TTGACTATCGACGACTTGGGTGTTGCTTCTTTCCACGGTACTTCTACTAAGGCTAACGAC  
AAGAACGAATCTGCTACTATCAACGAAATGATGAAGCACTTGGGTAGATCTGAAGGTAAC  
CCAGTTATCGGTGTTTTCCAAAAGTTCTTGACTGGTCAACCAAGGGTGTCTGGTGCT  
TGGATGATGAACGGTGCTTTGCAAATCTTGAACCTCTGGTATCATCCAGGTAACAGAAAC  
GCTGACAACGTTGACAAGATCTTGGAAACAATTCGAATACGTTTTGTACCCATCTAAGACT  
TTGAAGACTGACGGTGTAGAGCTGTTTCTATCACTTCTTTTCGGTTTCGGTCAAAAGGGT  
GGTCAAGCTATCGTTGTTTCAACCCAGACTACTTGTACGGTGTATCACTGAAGACAGATAC  
AACGAATACGTTGCTAAGGTTTTCTGCTAGAGAAAAGTCTGCTTACAAGTTCTTCCACAAC  
GGTATGATCTACAACAAGTTGTTGCTTCTAAGGAACACGCTCCATACACTGACGAATTG  
GAAGAAGACGTTTACTTGGACCCATTGGCTAGAGTTTCTAAGGACAAGAAGTCTGGTTCT  
TTGACTTTCAACTCTAAGAACATCCAATCTAAGGACTCTTACATCAACGCTAACACTATC  
GAAACTGCTAAGATGATCGAAAACATGACTAAGGAAAAGGTTTTCTAACGGTGGTGTGGT  
GTTGACGTTGAATTGATCACTTCTATCAACGTTGAAAACGACACTTTTCATCGAAAAGAAAC  
TTCACTCCACAAGAAATCGAATACTGTTCTGCTCAACCATCTGTTCAATCTTCTTTGCT  
GGTACTTGGTCTGCTAAGGAAGCTGTTTTCAAGTCTTTGGGTGTTAAGTCTTTGGGTGGT  
GGTGCTGCTTTGAAGGACATCGAAATCGTTAGAGTTAACAAGAACGCTCCAGCTGTTGAA  
TTGCACGGTAACGCTAAGAAGGCTGCTGAAGAAGCTGGTGTACTGACGTTAAGGTTTCT  
ATCTCTCACGACGACTTGAAGCTGTTGCTGTTGCTGTTTCTACTAAGAAGTAA

### **Supplementary Information - References**

Henritzi, S., Fischer, M., Grininger, M., Oreb, M., and Boles, E. (2018). An engineered fatty acid synthase combined with a carboxylic acid reductase enables de novo production of 1-octanol in *Saccharomyces cerevisiae*. *Biotechnol. Biofuels* 11, 150. doi:10.1016/j.jtrangeo.2006.11.008

Farwick A, Bruder S, Schadeweg V, Oreb M, Boles E (2014) Engineering of yeast hexose transporters to transport D-xylose without inhibition by D-glucose. *Proc. Natl. Acad. Sci. USA* 111: 5159–5164. doi:10.1073/pnas.1323464111
